# Supplementary material for: Mental health after paediatric concussion: a systematic review and meta-analysis
Source: HighWire-hosted journal article supplement (doi:10.1136/bjsports-2020-103548), 2021-04-29
Supplement: bjsports-2020-103548supp001_data_supplement.pdf [file bjsports-2020-103548supp001_data_supplement.pdf]

**SUPPLEMENTARY MATERIAL  
CONTENTS**

|                                           |    |
|-------------------------------------------|----|
| <b>SUPPLEMENTARY RESULTS</b> .....        | 2  |
| <b>SUPPLEMENTARY TABLES</b> .....         | 3  |
| <b>SUPPLEMENTARY FIGURE LEGENDS</b> ..... | 27 |
| <b>REFERENCES</b> .....                   | 28 |

## SUPPLEMENTARY RESULTS

### Methodological Characteristics

Most included studies recruited children through hospitals ( $n=56$ , 81.2%), including emergency departments ( $n=19$ , 27.5%), inpatient admissions ( $n=33$ , 47.8%) and outpatient services ( $n=15$ , 21.7%). Thirteen studies recruited from both inpatient and outpatient services. The remaining studies recruited participants from community sports organizations and local schools ( $n=2$ , 2.9%), population cohort ( $n=3$ , 4.3%), or via existing research databases ( $n=2$ , 2.9%).

Definitions of concussion were provided by all studies. Four studies explicitly stated that their definition aligned the Berlin Consensus Statement on Concussion in Sport, while the remaining studies employed criteria consistent with this definition or reported outcomes for an uncomplicated concussion subgroup.

Key participant demographics were considered by several studies including socio-economic status ( $n=27$ ), ethnicity ( $n=19$ ), number of previous concussions ( $n=11$ ), family functioning ( $n=5$ ) and parent mental health ( $n=5$ ).

## SUPPLEMENTARY TABLES

**Supplementary Table 1.** Reported mental health outcomes, study characteristics and quality assessment of included studies

| Study                       | N                                            | Design                                          | Setting                                                  | Country     | Male | Age at Injury, Range, M (SD) | Assessed Timepoints            | Report proxy   | Mental Health Measures | Main Mental Health Findings                                                                                                                                                      | DBC  | OCEBM   |
|-----------------------------|----------------------------------------------|-------------------------------------------------|----------------------------------------------------------|-------------|------|------------------------------|--------------------------------|----------------|------------------------|----------------------------------------------------------------------------------------------------------------------------------------------------------------------------------|------|---------|
| Albicini et al. (2018)* [1] | Concussion (n=65), Orthopaedic Injury (n=43) | Longitudinal, between-subjects, cross-sectional | Hospital, ED                                             | New Zealand | 66%  | 0-17 years, 10.86 (4.87)     | 12.17 years (5.31) post-injury | Child          | CIDI                   | Children with concussion reported significantly more psychiatric diagnoses than children with orthopaedic injuries with a moderate effect size.                                  | 13.5 | Level 4 |
| Anderson et al. (2001) [2]  | Concussion (n=31)                            | Prospective, longitudinal, between-group        | Hospital admissions to neurosurgical ward                | Australia   | 67%  | 2-12 years, 9.3 (2.9)        | 6 months post-injury           | Parent         | RBRI, PIC              | Behavioural functioning within the normal range pre- and post-concussion. Results showed slight but non-significant deterioration in behaviour scores post-injury.               | 16   | Level 3 |
| Anderson et al. (2005a) [3] | Concussion (n=10), TDC (n=26)                | A prospective, longitudinal, between group      | Hospital admissions to neurosurgical ward                | Australia   | 50%  | 2-7 years, 4.6 (1.3)         | 30-months post-injury          | Parent         | PIC                    | While mean internalising and somatic symptoms increased over time, no significant differences in internalising problems were observed compared to TDC 30 months-post-concussion. | 16   | Level 3 |
| Anderson et al. (2005b) [4] | Concussion (n=42)                            | Prospective, longitudinal, between group        | Hospital admissions to neurosurgical ward                | Australia   | 64%  | 3-12.11 years, 8.4 (3.0)     | 6- and 30-months post-injury   | Parent         | RBRI, PIC              | Although there was some within group variation, post-injury behaviour was within the normal range and remained stable from 6-months to 30-months post-injury.                    | 17.5 | Level 3 |
| Anderson et al. (2009) [5]  | Concussion (n=40)                            | Retrospective cross-sectional                   | Hospital admissions to neurosurgical ward                | Australia   | 70%  | 0-16 years, 10.19 (1.80)     | 2.5 years post-injury          | Medical record | Service engagement     | No differences were observed in psychiatric intervention between children with concussion and population data either acutely (17.5%) or in the long term (12.5%).                | 17.5 | Level 3 |
| Anderson et al. (2012a) [6] | Concussion (n=20)                            | Prospective, longitudinal, between group        | Admission to paediatric hospital ED or neurosurgery ward | Australia   | 60%  | 2-12:11 years, 8.36 (3.08)   | 10 years post-injury           | Parent         | Service engagement     | Children with concussion showed higher problem behaviors 10-years post injury than expected risk of impairment.                                                                  | 19   | Level 3 |

| Study                            | N                                            | Design                                   | Setting                                                                 | Country     | Male | Age at Injury, Range, M (SD) | Assessed Timepoints                  | Report proxy     | Mental Health Measures | Main Mental Health Findings                                                                                                                                                                                                                                                                                                                                                               | DBC  | OCEBM   |
|----------------------------------|----------------------------------------------|------------------------------------------|-------------------------------------------------------------------------|-------------|------|------------------------------|--------------------------------------|------------------|------------------------|-------------------------------------------------------------------------------------------------------------------------------------------------------------------------------------------------------------------------------------------------------------------------------------------------------------------------------------------------------------------------------------------|------|---------|
| Anderson et al. (2012b) [7]      | Concussion (n=130)                           | Prospective, longitudinal, between group | Admission to paediatric hospital ED or neurosurgery ward                | Australia   | 72%  | 6-14 years, 10.80 (2.42)     | Pre-injury, 6 months post-injury     | Parent           | CBCL                   | Internalising, externalising and total behaviour problems were not significantly different before and after concussion. Pre-injury ratings significantly predicted post-concussion behavioural functioning.                                                                                                                                                                               | 18   | Level 3 |
| Anderson et al. (2020) [8]       | Concussion (n=256)                           | Longitudinal prospective cohort study    | Paediatric hospital ED                                                  | Australia   | 72%  | 5-18 years,                  | 2 weeks, 3 months post-injury        | Parent           | CBCL                   | Children who recovered within 2 weeks demonstrated fewer internalising problems and lower rates of pre-injury psychiatric diagnoses than children with delayed recovery.                                                                                                                                                                                                                  | 18   | Level 3 |
| Antshel et al. (2007)* [9]       | Concussion (n=31), TDC (n=23)                | Cross-sectional, between groups          | Large urban academic medical center                                     | USA         | 74%  | 6-11 years, 9.5 (1:9)        | 3 and 6 months                       | Parent & teacher | BASC                   | Despite similar ratings in behaviour problems 3 months post-injury, parents reported significantly more externalising problems 6 months post-injury than controls, as well as children with positive MRI findings. In the absence of MRI findings, parents were more likely to attribute externalising problems to be within their child's control, rather than attributed to the injury. | 15.5 | Level 3 |
| Barker-Collo et al. (2007)* [10] | Concussion (n=40), Orthopaedic Injury (n=14) | Case control                             | ICU, neurology orthopaedic care units at a regional paediatric hospital | New Zealand | 68%  | 3.8-13 years, 8.54 (3.52)    | 2-24 months, 7.22 (7.15) post-injury | Parent           | CBCL                   | Behavioural problems fell within the normal range for concussion and control groups. Children with concussion exhibited lower scores on withdrawal, anxiety and depression compared with controls, resulting in a lower score on the internalising and total problem scores.                                                                                                              | 13.5 | Level 3 |

| Study                         | N                             | Design                          | Setting                         | Country   | Male | Age at Injury, Range, M (SD) | Assessed Timepoints                                        | Report proxy   | Mental Health Measures   | Main Mental Health Findings                                                                                                                                                                                                                                                                                                                                        | DBC  | OCEBM   |
|-------------------------------|-------------------------------|---------------------------------|---------------------------------|-----------|------|------------------------------|------------------------------------------------------------|----------------|--------------------------|--------------------------------------------------------------------------------------------------------------------------------------------------------------------------------------------------------------------------------------------------------------------------------------------------------------------------------------------------------------------|------|---------|
| Bellerose et al. (2015)* [11] | Concussion (n=51), TDC (n=50) | Prospective longitudinal cohort | ED                              | Canada    | 51%  | 1.5-5 years, 3.0 (0.9)       | 6.51 months, SD=0.83 post-injury                           | Parent         | CBCL                     | Externalising behaviors were significantly higher in the concussion group than control group both pre-injury and 6 months post-concussion with a moderate effect size.                                                                                                                                                                                             | 15   | Level 3 |
| Bernard et al. (2017)* [12]   | Concussion (n=46), TDC (n=55) | Prospective longitudinal        | ED                              | Australia | 63%  | 2-12 years 11 months         | <72 hours, 1 week, 1 month, 2 months, 3 months post-injury | Parent         | CAB-P, CBI               | Problematic behaviour significantly increased from pre-morbid levels in the concussion group compared with controls. Higher rates of premorbid post-concussive symptoms and the presence of premorbid learning difficulties were significant predictors of increased behavioural problems over time.                                                               | 16.5 | Level 3 |
| Bloom et al. (2001) [13]      | Concussion (n=15)             | Retrospective exploratory study | Paediatric Hospital             | USA       | 67%  | 6-15 years, m=9.9 (SD=4.4)   | 2.2 years post-injury                                      | Child & parent | CDI, PIC, DICA-R         | 40% youth with concussion developed novel psychiatric disorders, 13.33% developed two or more novel psychiatric disturbances. Mean scores on the PIC-R were within the normal range.                                                                                                                                                                               | 13.5 | Level 3 |
| Bohorquez-Montoya 2020* [14]  | Concussion (n=36), TDC (n=15) | Cross-sectional                 | Concussion clinic and community | USA       | 42%  | 14-18 years, 16.20 (1.07)    | <3 months, 52 (6.97) days                                  | Child          | GAD-7, PHD-9, BSI, SHAPS | Children with delayed recovery after concussion reported more depression symptoms and psychological distress than recovered children and TDC. Anxiety was also significantly higher among children with delayed recovery compared with controls. Anhedonia was significantly higher among children with delayed recovery than recovered children after concussion. | 13   | Level 3 |

| Study                        | N                                            | Design                           | Setting                                                     | Country   | Male | Age at Injury, Range, M (SD) | Assessed Timepoints                                  | Report proxy   | Mental Health Measures | Main Mental Health Findings                                                                                                                                                                                                                                                                                                                                                                              | DBC | OCEBM   |
|------------------------------|----------------------------------------------|----------------------------------|-------------------------------------------------------------|-----------|------|------------------------------|------------------------------------------------------|----------------|------------------------|----------------------------------------------------------------------------------------------------------------------------------------------------------------------------------------------------------------------------------------------------------------------------------------------------------------------------------------------------------------------------------------------------------|-----|---------|
| Botchway et al. (2019)* [15] | Concussion (n=14), TDC (n=13)                | Prospective longitudinal design  | Neurosurgical ward admissions, tertiary paediatric hospital | Australia | 64%  | 0-12 years, 9.2 (2.9)        | 20 years post-injury                                 | Child          | DASS                   | High levels of post-concussion pain and anxiety significantly correlated with poorer sleep quality.                                                                                                                                                                                                                                                                                                      | 18  | Level 3 |
| Brooks et al. (2018)* [16]   | Concussion (n=37), Orthopaedic Injury (n=16) | Prospective, multi-center cohort | Research databases                                          | Canada    | 54%  | 8-19 years, 12.1 (2.7)       | 2.7 years post injury                                | Child & parent | BASC-2                 | Parents of youth with a history of concussion reported significantly worse anxiety and depression symptoms than parents of children with orthopaedic injury.                                                                                                                                                                                                                                             | 16  | Level 3 |
| Brooks et al. (2018) [17]    | Concussion (n=275)                           | Cross-sectional                  | ED                                                          | Canada    | 65%  | 6-18 years, 11.6 (3.1)       | 4 weeks, 12 weeks post-injury                        | Parent         | CBCL, SDQ              | 22.9% of children reported psychological distress at 4 weeks post-concussion and 23.2% at 12 weeks post-concussion. 60% of children with a history of anxiety or depression had elevated psychological distress at 4 weeks and 50% at 12 weeks. Among children without a history of anxiety or depression, 19.3% met the criterion for elevated psychological distress at 4 weeks and 20.5% at 12 weeks. | 18  | Level 3 |
| Brown et al. (2016)* [18]    | Concussion (n=116), TDC (n=5,414)            | Prospective longitudinal Study   | Three tertiary paediatric hospitals                         | Australia | 69%  | 6-14 years, 10.44 (2.46)     | 3 months, 6 months, 12 months, 18 months post-injury | Parent         | CHQ-PF50               | Children with concussion showed clinically significant general behaviour problems compared with norms (3 months). Means fell within the normal range at subsequent time points (6 months). Older children demonstrated reduced functioning on behavioural and self-esteem subscales, but greater functioning on general behaviour.                                                                       | 14  | Level 3 |

| Study                        | N                                     | Design                                                 | Setting                                                      | Country           | Male | Age at Injury, Range, M (SD)  | Assessed Timepoints    | Report proxy | Mental Health Measures  | Main Mental Health Findings                                                                                                                                                                                                               | DBC  | OCEBM   |
|------------------------------|---------------------------------------|--------------------------------------------------------|--------------------------------------------------------------|-------------------|------|-------------------------------|------------------------|--------------|-------------------------|-------------------------------------------------------------------------------------------------------------------------------------------------------------------------------------------------------------------------------------------|------|---------|
| Bunt et al. (2020) [19]      | Concussion (n=491)                    | Prospective                                            | Specialized concussion clinics                               | USA               | 53%  | 12-18 years, 14.72 (1.64)     | 8.26 days (SD 5 7.30)  | Child        | GAD-7, PHQ-8            | Females reported significantly higher levels of anxiety and depression in the days after concussion.                                                                                                                                      | 15.5 | Level 3 |
| Butler et al. (1997) [20]    | Concussion (n=36)                     | Retrospective                                          | Two large urban clinics and one large urban private practice | USA               | UTD  | 6-16 years, 8.71 (3.4)        | 2.07 years post-injury | Parent       | PIC-R                   | 50% of children with concussion experience cognitive symptom profiles, while approximately 40% experience internalising symptoms and mild anxiety post-concussion.                                                                        | 12   | Level 3 |
| Catale et al. (2009) [21]    | Concussion (n=15)                     | Use of a longitudinal design with follow-up assessment | Admissions to neuro-paediatric unit                          | Belgium           | 33%  | 6.7–11.5 years, M=8.3, SD=1.2 | 1-year post-injury     | Parent       | CPRS-R                  | Children's behavioural symptoms before concussion within the normal range for all factors considered. Results showed significantly more impulsive hyperactive symptoms after concussion compared with pre-injury functioning.             | 12   | Level 3 |
| Catroppa et al. (2012)* [22] | Concussion (n=40), Matched TCD (n=19) | Prospective longitudinal design                        | Hospital admission, tertiary paediatric hospital             | Australia         | 43%  | 1.17-8.00 years, 4.81 (1.92)  | 10 years, 10.54 (1.57) | Parent       | PIC, BASC               | Externalising problems were significantly higher for the concussion group than for the control group. The concussion group showed a trend towards a higher percentage impaired for internalising problems and total behavioural symptoms. | 17   | Level 3 |
| Crichton et al. (2017) [23]  | Concussion (n=27)                     | Prospective longitudinal design                        | Hospital ED & ICU                                            | Australia, Canada | 85%  | 8-18 years, 13.3 (2.4)        | 6 weeks post-injury    | Parent       | CDI-2-P, CDI-2-SR, SCAS | Parent ratings of child depression was significantly associated with severe levels of fatigue.                                                                                                                                            | 18.5 | Level 3 |

| Study                       | N                                                        | Design                           | Setting                                 | Country   | Male | Age at Injury, Range, M (SD) | Assessed Timepoints                       | Report proxy | Mental Health Measures | Main Mental Health Findings                                                                                                                                                                                                                                                                                                                                                                                                                      | DBC  | OCEBM   |
|-----------------------------|----------------------------------------------------------|----------------------------------|-----------------------------------------|-----------|------|------------------------------|-------------------------------------------|--------------|------------------------|--------------------------------------------------------------------------------------------------------------------------------------------------------------------------------------------------------------------------------------------------------------------------------------------------------------------------------------------------------------------------------------------------------------------------------------------------|------|---------|
| Crowe et al. (2012)* [24]   | Concussion (n=20), TDC (n=27)                            | Cohort                           | Tertiary paediatric hospital ED and ICU | Australia | 55%  | 1-35 months, 17.7 (10.7)     | 40 months post-injury                     | Parent       | CBCL                   | Medium effect sizes were identified between the control and concussion group for emotionally reactive, withdrawn, and attention problems.                                                                                                                                                                                                                                                                                                        | 15   | Level 3 |
| Crowe et al. (2016) [25]    | Concussion (n=10)                                        | Prospective, longitudinal design | Local schools and sporting groups       | Australia | 70%  | 10-17 years, 14.6 (1.7)      | 30 days post-injury                       | Parent       | CHQ                    | 25.0% of parents rated their child as demonstrating post-concussion behaviour problems. Significant concerns were reported for 37.5% of cases for both mental health and family cohesion.                                                                                                                                                                                                                                                        | 17.5 | Level 2 |
| Ellis et al. (2015) [26]    | Concussion (n=174)                                       | Retrospective chart review       | Concussion clinic                       | Canada    | 62%  | <19 years, 14.22 (2.34)      | >1 month post-injury                      | Child        | Psychiatric diagnoses  | 11.5% of children met the criteria for a psychiatric diagnoses post-concussion, including 8.0% with novel psychiatric diagnoses, 1.1% with isolated suicidal ideation, and 2.3% with worsening symptoms of a preinjury psychiatric disorder. Female sex, higher acute PCSS score, higher emotional PCSS index, preinjury psychiatric history, and family history of psychiatric illness were significantly associated with psychiatric outcomes. | 14   | Level 3 |
| Fischer et al. (2018)* [27] | Concussion (n=11), Orthopaedic Injury (n=24), TDC (n=27) | Prospective longitudinal         | Level 1 Paediatric Trauma centre        | USA       | 64%  | 8-15 years, 12.2 (2.4)       | Baseline, 6 months, 12 months post-injury | Parent       | CBCL                   | Internalising problems were significantly higher after concussion compared with typically developing controls. No group differences in externalising problems observed between groups.                                                                                                                                                                                                                                                           | 15   | Level 3 |
| Study                       | N                                                        | Design                           | Setting                                 | Country   | Male | Age at Injury,               | Assessed Timepoints                       | Report proxy | Mental Health          | Main Mental Health Findings                                                                                                                                                                                                                                                                                                                                                                                                                      | DBC  | OCEBM   |



|                             |                                                          |                                 |                                                                           |        |     | Range,<br>M (SD)         |                                                 |        | Measures |                                                                                                                                                                                                                                                                                                                                                                                                                                          |      |         |
|-----------------------------|----------------------------------------------------------|---------------------------------|---------------------------------------------------------------------------|--------|-----|--------------------------|-------------------------------------------------|--------|----------|------------------------------------------------------------------------------------------------------------------------------------------------------------------------------------------------------------------------------------------------------------------------------------------------------------------------------------------------------------------------------------------------------------------------------------------|------|---------|
| Fletcher et al. (1990) [28] | Concussion (n=13)                                        | Longitudinal                    | Paediatric neurosurgery services of two major university trauma hospitals | USA    | 62% | 3-15 years, 8.6 (4.6)    | Time of injury, 6 months, 12 months post-injury | Parent | CBCL     | Scores on all scales were within the average range. No significant differences were found between scores at baseline, 6-months and 12-months post-concussion. No significant associations observed between CBCL scores and 75 cognitive variables.                                                                                                                                                                                       | 16.5 | Level 3 |
| Gagner et al. (2018)* [29]  | Concussion (n=86), TDC (n=81), Orthopaedic Injury (n=62) | Prospective longitudinal cohort | Tertiary care, paediatric ED                                              | Canada | 53% | 1.3-5 years, 3.63 (0.98) | 6 months post-injury                            | Parent | CBCL     | There were significantly higher ratings of internalising and externalising behaviors in the concussion group than both control groups. In the concussion group, 38.4% of children had at least one clinically elevated score, compared with 25.8% in the orthopaedic injury group and 18.5% in the TDC group. There was a significant difference in this proportion between concussion and TDC groups, but not orthopaedic injury group. | 18   | Level 3 |
| Gagner et al. (2020)* [30]  | Concussion (n=85), TDC (n=82), Orthopaedic Injury (n=59) | Prospective longitudinal cohort | Tertiary care, paediatric ED                                              | Canada | 53% | 1.3-5 years, 3.63 (0.98) | 6, 18 and 30 months post-injury                 | Parent | CBCL     | Children had significantly higher internalising and externalising problems 6 months post-injury compared with TDC, but not the orthopaedic injury group.                                                                                                                                                                                                                                                                                 | 19   | Level 3 |

| Study                           | N                                                     | Design                                     | Setting                                                        | Country   | Male | Age at Injury, Range, M (SD)  | Assessed Timepoints           | Report proxy   | Mental Health Measures    | Main Mental Health Findings                                                                                                                                                                                                                            | DBC  | OCEBM   |
|---------------------------------|-------------------------------------------------------|--------------------------------------------|----------------------------------------------------------------|-----------|------|-------------------------------|-------------------------------|----------------|---------------------------|--------------------------------------------------------------------------------------------------------------------------------------------------------------------------------------------------------------------------------------------------------|------|---------|
| Gornall et al. (2019)* [31]     | Concussion ( $n=231$ ), Orthopaedic Injury ( $n=11$ ) | Prospective longitudinal cohort            | Tertiary paediatric hospital ED                                | Australia | 73%  | 5-<18 years, 11.7 years (3.1) | 2 weeks, 3 months post-injury | Parent         | CBCL                      | Children with concussion showed a significant improvement in behavioural functioning from 2-weeks to 3-months post-injury. As age increased, females were at increased risk for experiencing ongoing internalising problems 3 months after concussion. | 18   | Level 3 |
| Gray et al. (2007) [32]         | Concussion ( $n=22$ ), Orthopaedic Injury ( $n=19$ )  | Qualitative                                | Hospital ED                                                    | USA       | 59%  | 7-16 years, 10.00 (2.64)      | 0.88 years (0.28) post-injury | Parent         | CBCL qualitative comments | Parents who endorsed high levels of after their child's concussion were most concerned about their child's poor school performance, lack of friends, inability to control angry feelings, apathy and problems with PTSD.                               | -    | -       |
| Guo et al. (2017) [33]          | Concussion ( $n=105$ )                                | Prospective                                | Paediatric hospital admission                                  | Australia | 73%  | 6-14 years, 10.82 (2.44)      | 6 months post-injury          | Child          | CAPS-CA                   | Female sex, sustained attention and working memory functioning predicted poor PTSD outcomes 6-months post-concussion.                                                                                                                                  | 17   | Level 3 |
| Ho et al. (2018; 2020) [34, 35] | Concussion ( $n=30$ )                                 | Single-site, cross-sectional investigation | Paediatric hospital, rehabilitation clinics, physician offices | Canada    | 33%  | 10-17 years, 13.8 (2.6)       | 5-8 weeks post-injury         | Child & parent | CDI                       | 36.7% of children experienced elevated depression following concussion.                                                                                                                                                                                | 15.5 | Level 3 |

| Study                       | N                                                      | Design                            | Setting                               | Country   | Male | Age at Injury, Range, M (SD) | Assessed Timepoints                               | Report proxy | Mental Health Measures  | Main Mental Health Findings                                                                                                                                                                                                                                                                                                                                                                                                                                                                    | DBC | OCEBM   |
|-----------------------------|--------------------------------------------------------|-----------------------------------|---------------------------------------|-----------|------|------------------------------|---------------------------------------------------|--------------|-------------------------|------------------------------------------------------------------------------------------------------------------------------------------------------------------------------------------------------------------------------------------------------------------------------------------------------------------------------------------------------------------------------------------------------------------------------------------------------------------------------------------------|-----|---------|
| Kaldoja et al. (2012)* [36] | Concussion ( $n=35$ ), matched TDC ( $n=70$ )          | Prospective case-controlled study | Hospital                              | Estonia   | 63%  | <5.5 years, 2.84 (1.66)      | Pre-injury, follow-up 9 months post-injury        | Parent       | ASQ-SE                  | Children with concussion showed more pre-injury social-emotional difficulties compared to matched TDC. At follow-up, children with concussion showed more general social-emotional problems compared to TDC, with worsening social interaction problems over time.                                                                                                                                                                                                                             | 16  | Level 4 |
| Keenan et al. (2018)* [37]  | Concussion ( $n=144$ ), Orthopaedic Injury ( $n=133$ ) | Prospective cohort                | Two level 1 paediatric trauma centres | USA       | 61%  | 2.5-15 years, 9.1 (4.3)      | Pre-injury, 3 months, 12 months post-injury       | Parent       | CBCL, SDQ               | Children with concussion had significantly higher scores on affective, anxiety, and ADHD subscales compared with the orthopaedic injury group. Children with concussion had decreasing symptoms over time. School-age children had high ADHD and affective symptoms scores, while pre-schoolers showed increasing symptoms over time. Females had significantly poorer functioning on all CBCL outcomes. A positive family environment was associated with better outcomes on all CBCL scales. | 18  | Level 3 |
| Kenardy et al. (2012) [38]  | Concussion ( $n=166$ )                                 | Prospective longitudinal          | Three tertiary paediatric hospitals   | Australia | 66%  | 6-15 years, 10.80 (2.42)     | Pre-injury, 2 months, 3, 6, 12 months post-injury | Child        | CBCL, CAPS-CA, CHQ-PF50 | 8% of the concussion group met PTSD diagnostic criteria. Children with PTSD showed significantly poorer psychosocial outcomes throughout the study period.                                                                                                                                                                                                                                                                                                                                     | 18  | Level 3 |

| Study                                | N                                            | Design                                            | Setting                                                                                           | Country         | Male | Age at Injury, Range, M (SD)        | Assessed Timepoints                  | Report proxy     | Mental Health Measures | Main Mental Health Findings                                                                                                                                                                                                                                                                                                        | DBC | OCEBM   |
|--------------------------------------|----------------------------------------------|---------------------------------------------------|---------------------------------------------------------------------------------------------------|-----------------|------|-------------------------------------|--------------------------------------|------------------|------------------------|------------------------------------------------------------------------------------------------------------------------------------------------------------------------------------------------------------------------------------------------------------------------------------------------------------------------------------|-----|---------|
| Konigs et al. (2015)* [39]           | Concussion (n=24), TDC (n=52)                | Retrospective recruitment from consecutive cohort | Three university-affiliated level I trauma centres                                                | The Netherlands | 46%  | 6-13 years, 7.1 (2.4)               | 1.7 years post-injury                | Parent & Teacher | CBCL                   | Children with concussion had more internalising problems according to teacher, but not parent report. No significant differences in internalising, externalising or attention problems were observed according to either parent and teacher report.                                                                                | 17  | Level 3 |
| Konigs et al. (2016)* [40]           | Concussion (n=24), TDC (n=52)                | Retrospective recruitment from consecutive cohort | Three university-affiliated level I trauma centres                                                | The Netherlands | 46%  | 6-13 years, 7.1 (2.4)               | 1.7 years post-injury                | Parent & Teacher | CBCL                   | Internalising behaviour problems were significantly higher among children with concussion according to teachers. Nil other significant differences observed in internalising, externalising or attention problems according to either parent and teacher report.                                                                   | 18  | Level 3 |
| Kontos et al. (2012) [41]            | Concussion (n=75)                            | Pretest, multiple posttest, repeated-measures     | Institutions involved in concussion surveillance program                                          | USA             | 74%  | High School <18 years, 15.74 (1.28) | 2-14 days post-injury                | Child            | BDI-II                 | Athletes reported significantly higher levels of depression symptoms from baseline at 2 days, 7 days, and 14 days post-concussion. There were no significant between-subject effects for age and sex on depression.                                                                                                                | 13  | Level 3 |
| Laliberté Durish et al. (2018)* [42] | Concussion (n=49), Orthopaedic Injury (n=26) | Cross-sectional                                   | Research databases consisting of patients recruited from various clinics at a paediatric hospital | Canada          | 47%  | 8-18 years, 11.68 (2.83)            | 2.7 years (m=33.40 months, SD=19.59) | Child & parent   | BASC-2, SDQ            | Significantly more general behavioural problems, higher levels of anxiety and depression, and poorer quality of life reported in the concussion group compared with controls. Higher levels of resilience were associated with better behavioural functioning, fewer self-reported depressive symptoms and better quality of life. | 15  | Level 3 |

| Study                        | N                                                                                     | Design                          | Setting                                                                                | Country | Male | Age at Injury, Range, M (SD)                                                        | Assessed Timepoints                                 | Report proxy    | Mental Health Measures | Main Mental Health Findings                                                                                                                                                                                                                                                                                                                                                                                                                                       | DBC  | OCEBM   |
|------------------------------|---------------------------------------------------------------------------------------|---------------------------------|----------------------------------------------------------------------------------------|---------|------|-------------------------------------------------------------------------------------|-----------------------------------------------------|-----------------|------------------------|-------------------------------------------------------------------------------------------------------------------------------------------------------------------------------------------------------------------------------------------------------------------------------------------------------------------------------------------------------------------------------------------------------------------------------------------------------------------|------|---------|
| Lalonde et al. (2020) [43]   | Concussion ( <i>n</i> =68), TDC ( <i>n</i> =76)<br>Orthopaedic Injury ( <i>n</i> =49) | Prospective longitudinal cohort | Urban tertiary care paediatric ED                                                      | Canada  | 56%  | 1.3-5 years, 3.49 (0.95)                                                            | 6 months post-injury                                | Parent          | CBCL                   | Child behaviour was not associated with parent-child interactions after concussion on any subscale. Socioeconomic status, child post-concussive symptoms, and child sleep problems significantly contributed to parent-child interactions.                                                                                                                                                                                                                        | 17   | Level 3 |
| Luis et al. (2002)* [44]     | Concussion ( <i>n</i> =42)<br>Orthopaedic Injury ( <i>n</i> =35)                      | Prospective cohort              | General Hospital admissions                                                            | USA     | 67%  | 6-15 years, 10.5 (3.3)                                                              | 6 months post-injury                                | Child           | DISC-IV, SRRQ          | Children with concussion had significantly higher rates of novel diagnoses compared to the control group. Post-injury stress level and injury severity significantly predicted subsequent disorders.                                                                                                                                                                                                                                                              | 14.5 | Level 3 |
| Massagli et al. (2004)* [45] | Concussion ( <i>n</i> =490) TDC ( <i>n</i> =1470)                                     | Prospective cohort              | ED ( <i>n</i> =279), outpatient ( <i>n</i> =191) and hospital settings ( <i>n</i> =20) | USA     | 62%  | <15 years, 0-4 years ( <i>n</i> =129), 5-9 ( <i>n</i> =161), 10-14 ( <i>n</i> =200) | 0-12 months, 12-24 months, 24-36 months post-injury | Medical records | Psychiatric Diagnoses  | 26% of children without a pre-morbid psychiatric history were diagnosed with a psychiatric illness after concussion. Evidence of any psychiatric illness during the 3-year follow-up was significantly higher among children with no psychiatric history after concussion compared with the control group. Psychiatric illness was estimated to occur in 55% of concussion patients and in 63% of controls ( <i>p</i> =0.63) who had a prior psychiatric history. | 15.5 | Level 3 |
| Study                        | N                                                                                     | Design                          | Setting                                                                                | Country | Male | Age at Injury,                                                                      | Assessed Timepoints                                 | Report proxy    | Mental Health          | Main Mental Health Findings                                                                                                                                                                                                                                                                                                                                                                                                                                       | DBC  | OCEBM   |

|                              |                                                           |                  |                                                                                |             | Range,<br>M (SD) |               |                                             |                         | Measures         |                                                                                                                                                                                                                                                                                                                                                                                                                                         |      |         |
|------------------------------|-----------------------------------------------------------|------------------|--------------------------------------------------------------------------------|-------------|------------------|---------------|---------------------------------------------|-------------------------|------------------|-----------------------------------------------------------------------------------------------------------------------------------------------------------------------------------------------------------------------------------------------------------------------------------------------------------------------------------------------------------------------------------------------------------------------------------------|------|---------|
| McKinlay et al. (2002)* [46] | Concussion (n=28) TDC (n=788)                             | Inception cohort | All hospital births in the region; inpatient and outpatient treated concussion | New Zealand | 72%              | <10 years old | Age 10, 11, 12, 13 (1-13 years post-injury) | Mother & teacher        | RBRS, CBRS       | Concussion inpatients showed increased attention and conduct problems than controls with medium to large effect sizes. After accounting for several demographic, family, and pre-injury characteristics, the inpatient but not the outpatient group displayed increased hyperactivity/inattention and conduct disorder between ages 10 to 13. Psychosocial deficits were more prevalent in the inpatient subgroup injured before age 5. | 17.5 | Level 2 |
| McKinlay et al. (2009)* [47] | Concussion (n=76) TDC (n=839)                             | Inception cohort | All hospital births in the region; inpatient and outpatient treated concussion | New Zealand | 53%              | <5 years old  | At age 14 to 16 years                       | Child, mother & teacher | DISC, SRED, RBPC | At age 14 to 16 years, children who had been hospitalized for concussion sustained in preschool years were significantly more likely to show symptoms of attention deficit/hyperactivity disorder (OR=4.2), conduct disorder/oppositional defiant disorder (OR=6.2), substance abuse (OR=3.6), and mood disorder (OR=3.1) but not anxiety disorder.                                                                                     | 17.5 | Level 2 |
| McKinlay et al. (2010)* [48] | Concussion (n=81), TDC (n=831), Orthopaedic injury (n=20) | Inception cohort | All hospital births in the region; inpatient and outpatient treated concussion | New Zealand | 51%              | <10 years old | Age 10, 11, 12, 13 (1-13 years post-injury) | Mother & teacher        | RBRS, CBRS       | Higher rates of ADHD, oppositional disorder and conduct disorder problems among children hospitalized for concussion, compared to children who attended outpatient services post-concussion and control group. The inpatient concussion group showed increasing behavioural difficulties over time.                                                                                                                                     | 16   | Level 2 |

| Study                        | N                                                              | Design              | Setting                                                                                          | Country     | Male | Age at Injury, Range, M (SD) | Assessed Timepoints                                    | Report proxy   | Mental Health Measures                     | Main Mental Health Findings                                                                                                                                                                                                                                                             | DBC  | OCEBM   |
|------------------------------|----------------------------------------------------------------|---------------------|--------------------------------------------------------------------------------------------------|-------------|------|------------------------------|--------------------------------------------------------|----------------|--------------------------------------------|-----------------------------------------------------------------------------------------------------------------------------------------------------------------------------------------------------------------------------------------------------------------------------------------|------|---------|
| McKinlay et al. (2014)* [49] | Concussion ( <i>n</i> =58), Orthopaedic injury ( <i>n</i> =38) | Longitudinal cohort | Audit of neurosurgical files, ED and admission records, and community                            | New Zealand | 53%  | 0-17 years, 7.1 (4.0)        | >5 years post-injury                                   | Child report   | EBS                                        | Children with concussion reported more problems with malevolent aggression, but not social anxiety or self-esteem compared with orthopaedic controls.                                                                                                                                   | 15   | Level 3 |
| O'Connor et al. (2012)* [50] | Concussion ( <i>n</i> =120) Orthopaedic Injury ( <i>n</i> =39) | Prospective cohort  | One Level 1 trauma centre, four Level 3 or 4 trauma centres and four non-trauma centre hospitals | USA         | 71%  | 14-17 years, 15.88 (0.93)    | 5 weeks, 3 months, 12 months and 24 months post-injury | Child & parent | PHQ, UCLA PTSD Reaction Index for DSM-IV-R | Children with concussion reported significantly worse PTSD symptoms across time compared to the control group. Greater levels of PTSD symptoms were associated with poorer school and physical functioning. Greater depressive symptoms were associated with poorer school functioning. | 18   | Level 3 |
| Plourde et al. (2018)* [51]  | Concussion ( <i>n</i> =48) Orthopaedic Injury ( <i>n</i> =27)  | Cross-sectional     | Tertiary care paediatric hospital                                                                | Canada      | 46%  | 8-19 years, 11.61 (2.72)     | >12 months, 35.92 months post-injury                   | Child          | BASC-2, SDQ                                | No significant differences were observed on long-term psychosocial functioning between groups. Pre-existing mood concerns and attention problems significantly predicted psychosocial adjustment post-concussion.                                                                       | 17   | Level 3 |
| Plourde et al. (2019) [52]   | Concussion ( <i>n</i> =33)                                     | Cross-sectional     | ED                                                                                               | Canada      | 49%  | 9.5-18.6 years, 4.9 (2.4)    | 15.5-31.2 months post-injury, 22.8 (5.6),              | Child & parent | BASC-2, C-DISC-IC                          | 18.2% of participants and parents reported at least mild post-concussion anxiety, while 6.5% met diagnostic criteria for generalized anxiety disorder. 9.1-12.1% reported depressive symptoms, with 6.5% meeting criteria for a major depressive episode.                               | 14.5 | Level 3 |

| Study                        | N                                | Design                            | Setting                                                                                                  | Country   | Male | Age at Injury, Range, M (SD)                             | Assessed Timepoints                              | Report proxy        | Mental Health Measures | Main Mental Health Findings                                                                                                                                                                                                                                                                                                                     | DBC  | OCEBM   |
|------------------------------|----------------------------------|-----------------------------------|----------------------------------------------------------------------------------------------------------|-----------|------|----------------------------------------------------------|--------------------------------------------------|---------------------|------------------------|-------------------------------------------------------------------------------------------------------------------------------------------------------------------------------------------------------------------------------------------------------------------------------------------------------------------------------------------------|------|---------|
| Renstrom et al. (2012)* [53] | Concussion (n=13), TDC (n=229)   | Case-control retrospective design | University Hospital Department of Paediatrics, neurosurgery, neurorehabilitation, surgery & orthopaedics | Sweden    | 60%  | 7-18 years, 12.9 years (3.1)                             | 4.7–8.6 years post-injury, 6.8 (1.1)             | Child               | SF-36                  | The concussion group showed lower but non-significant mental health outcomes compared with the control group. Nearly half of the participants with concussion reported that their life situation was negatively influenced by the concussion including problems with finding jobs, affected school results and difficulties in everyday living. | 12   | Level 4 |
| Rockhill et al. (2010)* [54] | Concussion (n=490), TDC (n=1470) | Prospective cohort                | Large HMO                                                                                                | USA       | 62%  | <15 years, 0-4 years (n=129), 5-9 (n=161), 10-14 (n=200) | 3 years post-injury                              | Healthcare provider | ICD-9 Codes            | 28% of children experienced psychological distress in the 3 years after concussion, compared with 18% of TDC (OR=1.71). Presence of psychological distress was also associated with increased costs in all categories examined and was associated with an approximate doubling of mean total costs.                                             | 17.5 | Level 3 |
| Rosema et al. (2015)* [55]   | Concussion (n=13) TDC (n=20)     | Prospective, longitudinal         | Neurosurgical Ward, tertiary paediatric hospital                                                         | Australia | 59%  | 1-7 years 11 months, 4.59 (1.64)                         | Acute, 6 months, 5, 10- and 16-years post-injury | Parent              | PIC, ABCL, PIC         | The concussion group showed significantly higher levels of internalising and externalising symptoms between six months and 10 years post-injury. Mean levels internalising and externalising symptoms for both groups fell within the average range.                                                                                            | 17   | Level 3 |
| Study                        | N                                | Design                            | Setting                                                                                                  | Country   | Male | Age at Injury,                                           | Assessed Timepoints                              | Report proxy        | Mental Health          | Main Mental Health Findings                                                                                                                                                                                                                                                                                                                     | DBC  | OCEBM   |



| Study                        | N                                         | Design                   | Setting                                  | Country   | Male | Range,                       | Assessed                        | Report            | Mental           | Main Mental Health Findings                                                                                                                                                                                                                                                                                                                 | DBC | OCEBM   |
|------------------------------|-------------------------------------------|--------------------------|------------------------------------------|-----------|------|------------------------------|---------------------------------|-------------------|------------------|---------------------------------------------------------------------------------------------------------------------------------------------------------------------------------------------------------------------------------------------------------------------------------------------------------------------------------------------|-----|---------|
|                              |                                           |                          |                                          |           |      | M (SD)                       |                                 |                   |                  |                                                                                                                                                                                                                                                                                                                                             |     |         |
| Ryan et al. (2015) [56]      | Concussion (n=15)                         | Longitudinal prospective | Paediatric hospital emergency department | Australia | 53%  | 1-12 years, 7.89 (3.68)      | 16 years post-injury            | Significant other | ABCL             | 20% of the concussion group showed clinical or subthreshold levels of externalising symptoms 16 years post-injury. Clinical or subthreshold levels of externalising problems were not associated with injury severity but were, instead equally apparent across young adults with TBI of all severity levels.                               | 18  | Level 3 |
| Ryan et al. (2016)* [57]     | Concussion (n=13) TDC (n=33)              | Longitudinal             | Hospital                                 | Australia | 75%  | 5.3-15.4 years, 10.69 (2.35) | 24 months post-injury           | Parent            | CBCL             | No significant differences observed between concussion and TDC groups on total behaviour problems.                                                                                                                                                                                                                                          | 15  | Level 3 |
| Ryan et al. (2019) [58]      | Concussion (n=15)                         | Prospective cohort       | Hospital admissions                      | Australia | 53%  | 1-12 years, 7.23 (3.5)       | 15 years post-injury            | Child             | GHQ              | Depression symptoms post-injury predicted psychological quality of life 15 years postinjury.                                                                                                                                                                                                                                                | 18  | Level 3 |
| Sariaslan et al. (2016) [59] | Concussion (n=80,676), TDC (n=1,039, 180) | Inception cohort         | Population Cohort                        | Sweden    | 61%  | 0-25 years, 12.2 (0.02)      | Lifetime prevalence post-injury | Clinician         | Hospital records | Risk of psychiatric visit and psychiatric hospitalization were 31% and 52% higher in the concussion group compared with family members who did not sustain a TBI and adjusting for sex, birth order, birth year, individual and parental education, income, parental lifetime criminal and psychiatric histories and maternal single status | 18  | Level 2 |

|                              |                                                |                   |                                                                  |                |             |                                     |                                 |                     |                               |                                                                                                                                                                                                                                                                                                                                                                                                                 |            |              |
|------------------------------|------------------------------------------------|-------------------|------------------------------------------------------------------|----------------|-------------|-------------------------------------|---------------------------------|---------------------|-------------------------------|-----------------------------------------------------------------------------------------------------------------------------------------------------------------------------------------------------------------------------------------------------------------------------------------------------------------------------------------------------------------------------------------------------------------|------------|--------------|
| Schachar et al. (2004)* [60] | Concussion (n=65)<br>TDC (n=57)                | Historical cohort | Several large, urban paediatric hospitals                        | USA            | 59%         | 0.4-13.7 years, 6.1 (3.3)           | >2 years post-injury, 5.1 (2.1) | Parent & Teacher    | SDI                           | Secondary ADHD symptoms and diagnoses significantly higher in concussion group compared with controls. No significant differences in anxiety symptoms or diagnoses post-concussion.                                                                                                                                                                                                                             | 11.5       | Level 3      |
| Scott et al. (2015)* [61]    | Concussion (n=61)<br>Orthopaedic injury (n=43) | Cohort            | Audit of neurosurgery files, ED admissions and community notices | New Zealand    | 54%         | 1-17 years, 7.1 (4.0)               | 15.1 (4.7) years post-injury    | Child               | CIDI                          | The concussion group showed significantly more anxiety disorder diagnoses and substance abuse disorders compared with controls. Depression and offending were twice as prevalent in the concussion group. Anxiety disorders were three times more prevalent in females, whilst offending behaviour and substance abuse/dependence was 4-5 times higher in males after concussion.                               | 13.5       | Level 3      |
| Smyth et al. (2014) [62]     | Concussion (n=89)                              | Cross-sectional   | Research databases                                               | Canada         | 65%         | 0-18 years, 13.8 (3.2)              | 1.73 years post-injury          | Child               | CDI                           | Depression scores in the symptomatic and asymptomatic concussion groups did not differ significantly. 3% of children with concussion had clinically significant depression symptoms. Age and stressful life events showed a significant difference between groups. After controlling for the effects of age, the stressful life events score was a significant predictor of being symptomatic after concussion. | 15         | Level 3      |
| <b>Study</b>                 | <b>N</b>                                       | <b>Design</b>     | <b>Setting</b>                                                   | <b>Country</b> | <b>Male</b> | <b>Age at Injury, Range, M (SD)</b> | <b>Assessed Timepoints</b>      | <b>Report proxy</b> | <b>Mental Health Measures</b> | <b>Main Mental Health Findings</b>                                                                                                                                                                                                                                                                                                                                                                              | <b>DBC</b> | <b>OCEBM</b> |

|                                 |                                                   |                                                        |                                                                                                                                 |                |             |                                     |                                        |                     |                               |                                                                                                                                                                                                                                                                                                                                                       |            |              |
|---------------------------------|---------------------------------------------------|--------------------------------------------------------|---------------------------------------------------------------------------------------------------------------------------------|----------------|-------------|-------------------------------------|----------------------------------------|---------------------|-------------------------------|-------------------------------------------------------------------------------------------------------------------------------------------------------------------------------------------------------------------------------------------------------------------------------------------------------------------------------------------------------|------------|--------------|
| Stojanovski et al. (2019)* [63] | Concussion (n=418)<br>Orthopaedic Injury (n=3193) | Retrospective population cohort                        | Population Cohort                                                                                                               | USA            | 61%         | 8-22 years, 14.4 (3.4)              | UTD                                    | Child & parent      | GOASSESS                      | Children with concussion had a significantly higher ADHD symptom severity score compared with children with other injuries ( $p=0.002$ ).                                                                                                                                                                                                             | 14         | Level 2      |
| Taylor et al. (2015)* [64]      | Concussion (n=56)<br>Orthopaedic injury (n=41)    | Cohort                                                 | Audit of ED admissions, neuro-surgery files, community recruitment                                                              | New Zealand    | 50%         | 0-18 years, 6.7 (4.0)               | >5 years post-injury                   | Child               | DSMIV-TR Structured Interview | Small, non-significant increase in Major Depressive Disorder diagnoses were observed in the concussion group compared with the orthopaedic control group.                                                                                                                                                                                             | 16         | Level 3      |
| Theadom et al. (2016)* [65]     | Concussion (n=68)<br>TCD (n=68)                   | Longitudinal study with an embedded case control study | Hospital & ambulance records, school and sports clubs, general practitioner, allied health service referrals, and self-referral | New Zealand    | 60%         | 8-16 years, 10.5 (2.1)              | 1-year post-injury                     | Child & parent      | BASC-2                        | Significantly higher internalising and externalising behaviour problems 1-year after concussion, compared with the control group. Sleep quality was significantly associated with externalising behaviour ( $p<0.01$ ) while age, sleep quantity and pain were significantly associated with internalising behaviour ( $p<0.01$ for all comparisons). | 16         | Level 2      |
| Truss et al. (2017) [66]        | Concussion (n=120)                                | Prospective longitudinal cohort                        | Paediatric hospital emergency department                                                                                        | Australia      | 63%         | 5-18 years, 12.0 (2.4)              | 2 weeks, 1 month, 3 months post-injury | Child               | CPSS                          | 16% of children had clinically significant post-traumatic symptoms 2-weeks post-concussion, declining to 10% at 1 month and 6% at 3 months post-injury. Group-based trajectory modelling identified three trajectories of post-traumatic stress symptoms post-concussion "resilient" (70%); "recovering" (25%) and "chronic symptomatology" (5%).     | 13.5       | Level 3      |
| <b>Study</b>                    | <b>N</b>                                          | <b>Design</b>                                          | <b>Setting</b>                                                                                                                  | <b>Country</b> | <b>Male</b> | <b>Age at Injury, Range, M (SD)</b> | <b>Assessed Timepoints</b>             | <b>Report proxy</b> | <b>Mental Health Measures</b> | <b>Main Mental Health Findings</b>                                                                                                                                                                                                                                                                                                                    | <b>DBC</b> | <b>OCEBM</b> |

|                                    |                                                    |                  |                                                                  |        |     |                         |                                                             |           |                                       |                                                                                                                                                                                                                                                                                                                |      |         |
|------------------------------------|----------------------------------------------------|------------------|------------------------------------------------------------------|--------|-----|-------------------------|-------------------------------------------------------------|-----------|---------------------------------------|----------------------------------------------------------------------------------------------------------------------------------------------------------------------------------------------------------------------------------------------------------------------------------------------------------------|------|---------|
| Valovich McLeod et al. (2017) [67] | Concussion (n=12)                                  | Qualitative      | Secondary Schools                                                | USA    | 67% | 13-18 years, 15.7 (1.7) | 13-20 days, follow-up in first 2 months post-injury         | Child     | Qualitative semi-structured interview | Participants reported increased emotional symptoms, including irritability, sadness, depression, and anxiousness post-concussion, and felt that this affected their school and social roles. Participants described trying to minimize or mask concussion symptoms to avoid being viewed differently by peers. | -    | -       |
| Wilmoth et al. (2019) [68]         | Concussion (n=141)                                 | Prospective      | Outpatient clinics participating in regional concussion registry | USA    | 54% | 12-18 years, 15.0 (1.6) | 2 weeks, 3 months post-injury                               | Child     | GAD-7, PHQ                            | The GAD-7 significantly predicted delayed recovery, with a 1.4-fold increased risk for every point.                                                                                                                                                                                                            | 14   | Level 3 |
| Yang et al. (2016)* [69]           | Concussion (n=3,605), TDC (n=41,664), OI (n=2,179) | Inception cohort | Population cohort                                                | Taiwan | 60% | ≤12 years, 5:7 (3:4)    | 9-year cumulative incidence, median=4.5 8 years post-injury | Clinician | Diagnosis of ADHD                     | Children with concussion had a 1.3-fold increased risk of ADHD (95% CI = 1.10, 1.53)                                                                                                                                                                                                                           | 17.5 | Level 2 |

\*Study included in meta-analysis.

Abbreviations: Ages and Stages Questionnaire – Social and Emotional Index (ASQ-SE); Behaviour Assessment System for Children (BASC); Brief Symptom Inventory (BSI); Child Behaviour Checklist (CBCL); Child Depression Inventory (CDI); Child Health Questionnaire (CHQ); Child PTSD Symptom Scale (CPSS); Composite International Diagnostic Interview (CIDI); Clinician-Administered PTSD Scale (CAPS-CA); Connors Behaviour Rating Scale (CBRS); Depression, Anxiety and Stress Scale (DASS); Downs and Black Criteria (DBC); Diagnostic Interview Schedule for Children (DISC); Diagnostic Interview for Children and Adolescents-Revised (DICA-R); Emergency Department (ED); Generalized Anxiety Disorder Screener (GAD-7); International Classification of Diseases, Ninth Edition (ICD-9); Patient Health Questionnaire (PHQ); Personality Inventory for Children (PIC); Snaith-Hamilton Pleasure Scale (SHAPS); Self-Report Early Delinquency scale (SRED); Social Readjustment Rating Questionnaire (SRRQ); Revised Behaviour Problems Checklist (RBPC); Rowe Behavioural Rating Inventory (RBRI); Rutter Children Behaviour Questionnaire (RCBQ); Short Form 36 Health Survey (SF-36); Spence Anxiety Scales (SAS); Spence Children's Anxiety Scale (SCAS); and Survey Diagnostic Inventory (SDI); Typically developing control (TDC).

**Supplementary Table 2.** Subgroup analyses of internalising and externalising difficulties after paediatric concussion

|                                  | <u>Persisting</u> |           |          | <u>Chronic</u> |           |          |
|----------------------------------|-------------------|-----------|----------|----------------|-----------|----------|
|                                  | <i>Q</i>          | <i>df</i> | <i>p</i> | <i>Q</i>       | <i>df</i> | <i>p</i> |
| <u>Internalising</u>             |                   |           |          |                |           |          |
| OCEBM                            | 0.31              | 1         | 0.57     | 7.15           | 2         | 0.03*    |
| Data type                        | 0.95              | 2         | 0.62     | 8.87           | 2         | 0.01*    |
| Control group                    | 0.26              | 2         | 0.88     | 4.2            | 2         | 0.12     |
| Pre-injury psychiatric exclusion | 0.43              | 1         | 0.51     | 0.18           | 1         | 0.67     |
| Measure type                     | 4.98              | 2         | 0.08     | 1.18           | 2         | 0.55     |
| <u>Externalising</u>             |                   |           |          |                |           |          |
| OCEBM                            | 0.83              | 1         | 0.36     | 1.35           | 1         | 0.24     |
| Data type                        | 4.08              | 2         | 0.12     | 1.29           | 2         | 0.53     |
| Control group                    | 2.30              | 3         | 0.51     | 1.01           | 2         | 0.60     |
| Pre-injury psychiatric exclusion | 0.72              | 1         | 0.40     | 0.43           | 1         | 0.51     |
| Measure type                     | 2.51              | 1         | 0.11     | 7.66           | 2         | 0.02*    |

**Supplementary Table 3.** Meta-regression of internalising and externalising difficulties after paediatric concussion

|                                  | <u>Persisting</u> |      |      | <u>Chronic</u> |      |      |
|----------------------------------|-------------------|------|------|----------------|------|------|
|                                  | $R^2$             | $F$  | $p$  | $R^2$          | $F$  | $p$  |
| <u>Internalising</u>             |                   |      |      |                |      |      |
| Mean age (years)                 | 0.00              | 0.06 | 0.81 | 0.00           | 0.36 | 0.56 |
| Sex (% male)                     | 0.00              | 0.06 | 0.81 | 0.06           | 1.25 | 0.29 |
| Pre-injury mental health         | 0.16              | 0.96 | 0.36 | -              | -    | -    |
| Pre-injury psychiatric exclusion | 0.00              | 0.48 | 0.50 | 0.00           | 0.41 | 0.53 |
| DBC                              | 0.00              | 0.08 | 0.79 | 0.08           | 1.52 | 0.24 |
| <u>Externalising</u>             |                   |      |      |                |      |      |
| Mean age (years)                 | 0.00              | 0.14 | 0.72 | 0.05           | 1.72 | 0.22 |
| Sex (% male)                     | 0.00              | 0.38 | 0.55 | 0.00           | 0.84 | 0.38 |
| Pre-injury mental health         | -                 | -    | -    | -              | -    | -    |
| Pre-injury psychiatric exclusion | 0.08              | 1.36 | 0.33 | 0.00           | 0.29 | 0.60 |
| DBC                              | 0.00              | 0.00 | 0.99 | 0.00           | 0.97 | 0.35 |

---

**Supplementary Table 4.** Search strategy for Medline.

---

*Set Search Statement*

1. brain injuries/ or brain injuries, traumatic/ or brain concussion/
  2. exp Head Injuries, Closed/
  3. concuss\*.tw,kf.
  4. ((mild or minor) adj3 (brain or traumatic or tbi)).tw,kf.
  5. mtbi.tw,kf.
  6. 1 or 2 or 3 or 4 or 5
  7. mood disorders/ or mental disorders/ or mental health/ or child behaviour disorders/ or conversion disorder/ or psychological trauma/ or stress disorders, post-traumatic/ or stress disorders, traumatic, acute/ or "Quality of Life"/
  8. anxiety disorders/ or anxiety/
  9. (anxious or anhedonia or apathy or shy\* or (social adj adjustment) or (social adj isolation) or (psychological adj stress) or depress\* or (affective adj symptom\*) or (emotional adj adjustment) or melanchol\* or internalizing or internalizing\*).tw,kf.
  10. (mental adj illness).tw,kf.
  11. depressive disorder/ or depression/ or depressive disorder, major/
  12. exp "attention deficit and disruptive behaviour disorders"/
  13. 7 or 8 or 9 or 10 or 11 or 12
  14. (boy\*1 or girl\*1 or child\* or adolescen\* or juvenile or teen\* or youth\*1 or pediatric\* or paediatric\* or preschool or pre-school or infant).af.
  15. 6 and 13 and 14
  16. limit 15 to (case reports or comment or editorial or letter or "review")
  17. 15 not 16
  18. exp animals/ not human\*.sh.
  19. 17 not 18
  20. limit 19 to (english language and yr="1980 -Current")
-

---

**Supplementary Table 5.** Search strategy for Embase & Embase Classic.

---

*Set Search Statement*

1. concussion/ or brain concussion/ or traumatic brain injury/ or brain injury/ or acquired brain injury/
  2. ((closed adj head adj injur\*) or concuss\* or mtbi).tw,kw,dq.
  3. ((mild or minor) adj3 (brain or traumatic or tbi)).tw,kw,dq.
  4. 1 or 2 or 3
  5. minor depression/ or "mixed anxiety and depression"/ or depression assessment/ or depression/ or major depression/
  6. anxiety disorder/ or anxiety/ or posttraumatic stress disorder/ or psychotrauma/
  7. mood disorder/ or mental health/ or "psychological well-being"/ or mental disease/ or "quality of life"/
  8. (anxious or anhedonia or apathy or shy\* or (social adj adjustment) or (social adj isolation) or (psychological adj stress) or depress\* or (affective adj symptom\*) or (emotional adj adjustment) or melanchol\* or internali#ing or internali#e\* or externali#ing or externali#e).tw,kw,dq.
  9. (mental adj illness).tw,kw,dq.
  10. attention deficit disorder/ or behavior disorder/
  11. somatoform disorder/ or conversion disorder/
  12. 5 or 6 or 7 or 8 or 9 or 10 or 11
  13. (boy\*1 or girl\*1 or child\* or adolescen\* or juvenile\* or teen\* or youth\*1 or paediatric\* or pediatric\* or preschool or pre-school or infant\*).af.
  14. 4 and 12 and 13
  15. adolescent depression/
  16. 4 and 15
  17. 14 or 16
  18. limit 17 to (editorial or letter or "review")
  19. 17 not 18
  20. exp animal/ not human\*.sh.
  21. 19 not 20
  22. (depressed adj1 (skull or fracture)).tw,kw,dq.
  23. 21 not 22
  24. limit 23 to (english language and yr="1980-Current")
-



---

**Supplementary Table 6.** Search strategy for PsycInfo

---

*Set Search Statement*

1. Brain Concussion/ or Traumatic Brain Injury/ or head injury/ or brain injury/
  2. (concuss\* or (closed adj head adj injur\*)).ti,ab,id.
  3. ((mild or minor) adj3 (brain or traumatic or tbi)).ti,ab,id.
  4. mtbi.ti,ab,id.
  5. 1 or 2 or 3 or 4
  6. affective disorders/ or mental disorders/ or adjustment/ or emotional disturbances/ or emotional states/ or coping behavior/ or behavior problems/ or somatoform disorders/ or conversion disorder/ or emotional disturbances/ or Posttraumatic Stress Disorder/ or Emotional Trauma/ or Psychological Stress/ or Attention Deficit Disorder/ or "well being"/ or "quality of life"/
  7. internalization/ or externalization/
  8. MAJOR DEPRESSION/ or "DEPRESSION (EMOTION)"/
  9. ANXIETY DISORDERS/ or ANXIETY/
  10. (anxious or anhedonia or apathy or shy\* or (social adj adjustment) or (social adj isolation) or (psychological adj stress) or depress\* or (affective adj symptom\*) or (emotional adj adjustment) or melanchol\* or internali#ing or internali#e\* or externali#ing or externali#e\*).ti,ab,id.
  11. 6 or 7 or 8 or 9 or 10
  12. (boy\*1 or girl\*1 or child\* or adolescen\* or juvenile\* or teen\* or youth\*1 or paediatric\* or pediatric\* or preschool or pre-school or infan\*).af.
  13. 5 and 11 and 12
  14. limit 13 to ("comment/reply" or editorial or letter or review-book or review-media or reviews)
  15. 13 not 14
  16. exp animals/ not human\*.sh.
  17. 15 not 16
  18. (depressed adj1 (skull or fracture)).ti,ab,id.
  19. 17 not 18
  20. limit 19 to (english language and yr="2020 -Current")
-

---

**Supplementary Table 7.** Articles retrieved by database

---

| <i>Database</i>     | <i>Articles Retrieved</i> |
|---------------------|---------------------------|
| OVID - MEDLINE      | 1,628                     |
| OVID - EMBASE       | 3,203                     |
| OVID - PsycINFO     | 1,903                     |
| EBSCO - CINAHL      | 273                       |
| EBSCO - SPORTDiscus | 19                        |
| Scopus              | 4,518                     |
| PubMed              | 739                       |
| <i>Total</i>        | 12,283                    |

---

### SUPPLEMENTARY FIGURE LEGENDS

**Figure 1.** Standard mean difference of acute, persisting, and chronic internalising problems after paediatric concussion omitting outliers.

**Figure 2.** Standard mean difference of acute, persisting, and chronic externalising problems after paediatric concussion omitting outliers.

**Figure 3.** Standard mean difference of acute, persisting, and chronic total problems after paediatric concussion omitting outliers.

**Figure 4.** Persisting and chronic internalising problems after paediatric concussion by design.

**Figure 5.** Persisting and chronic externalising problems after paediatric concussion by design.

**Figure 6.** Persisting and chronic internalising problems after paediatric concussion by respondent.

**Figure 7.** Persisting and chronic externalising problems after paediatric concussion by respondent.

## REFERENCES

- 1 Albicini M, McKinlay A. Anxiety Disorders in Adults With Childhood Traumatic Brain Injury: Evidence of Difficulties More Than 10 Years Postinjury. *J Head Trauma Rehabil* 2018;33:191-9. doi:10.1097/htr.0000000000000312
- 2 Anderson VA, Catroppa C, Haritou F, Morse S, Pentland L, Rosenfeld J, et al. Predictors of acute child and family outcome following traumatic brain injury in children. *Pediatr Neurosurg* 2001;34:138-48. doi:10.1159/000056009
- 3 Anderson V, Catroppa C, Morse S, Haritou F, Rosenfeld J. Attentional and processing skills following traumatic brain injury in early childhood. *Brain Inj* 2005;19:699-710. doi:10.1080/02699050400025281
- 4 Anderson VA, Catroppa C, Haritou F, Morse S, Rosenfeld JV. Identifying factors contributing to child and family outcome 30 months after traumatic brain injury in children. *J Neurol Neurosurg Psychiatry* 2005;76:401-8. doi:10.1136/jnnp.2003.019174
- 5 Anderson V, Brown S, Newitt H, Hoile H. Educational, vocational, psychosocial, and quality-of-life outcomes for adult survivors of childhood traumatic brain injury. *J Head Trauma Rehabil* 2009;24:303-12. doi:10.1097/HTR.0b013e3181ada830
- 6 Anderson V, Godfrey C, Rosenfeld JV, Catroppa C. 10 years outcome from childhood traumatic brain injury. *Int J Dev Neurosci* 2012;30:217-24. doi:10.1016/j.ijdevneu.2011.09.008
- 7 Anderson V, Le Brocque R, Iselin G, Eren S, Dob R, Davern TJ, et al. Adaptive ability, behavior and quality of life pre and posttraumatic brain injury in childhood. *Disabil Rehabil* 2012;34:1639-47. doi:10.3109/09638288.2012.656789
- 8 Anderson V, Davis GA, Takagi M, Dunne K, Clarke C, Anderson N, et al. Trajectories and Predictors of Clinician-Determined Recovery after Child Concussion. *J Neurotrauma* 2020;37:1392-400. doi:10.1089/neu.2019.6683
- 9 Antshel KM, Malhotra A, Seigers D. Attributions of behavior in the paediatric mild closed head injury (CHI) population. *Psychol Health Med* 2007;12:48-63. doi:10.1080/13548500500535654
- 10 Barker-Collo SL. Behavioural profiles and injury severity following childhood traumatic brain injury. *Brain Impair* 2007;8:22-30. doi:10.1375/brim.8.1.22
- 11 Bellerose J, Bernier A, Beaudoin C, Gravel J, Beauchamp MH. When Injury Clouds Understanding of Others: Theory of Mind after Mild TBI in Preschool Children. *J Int Neuropsych Soc* 2015;21:483-93. doi:10.1017/S1355617715000569
- 12 Bernard CO, Ponsford JL, McKinlay A, McKenzie D, Krieser D. Do Concussive Symptoms Really Resolve in Young Children? *J Head Trauma Rehabil* 2017;32:413-24. doi:10.1097/HTR.0000000000000298
- 13 Bloom DR, Levin HS, Ewing-Cobbs L, Saunders AE, Song J, Fletcher JM, et al. Lifetime and novel psychiatric disorders after paediatric traumatic brain injury. *J Am Acad Child Psy* 2001;40:572-9. doi:10.1097/00004583-200105000-00017
- 14 Bohorquez-Montoya L, España LY, Nader AM, Furger RE, Mayer AR, Meier TB. Amygdala response to emotional faces in adolescents with persistent post-concussion symptoms. *Neuroimage Clin* 2020;26:102217. doi:10.1016/j.nicl.2020.102217
- 15 Botchway EN, Godfrey C, Anderson V, Nicholas CL, Catroppa C. Outcomes of Subjective Sleep-Wake Disturbances Twenty Years after Traumatic Brain Injury in Childhood. *J Neurotrauma* 2019;36:669-78. doi:10.1089/neu.2018.5743

- 16 Brooks BL, Low TA, Plourde V, Virani S, Jadavji Z, MacMaster FP, et al. Cerebral blood flow in children and adolescents several years after concussion. *Brain Inj* 2019;33:233-41. doi:10.1080/02699052.2018.1540798
- 17 Brooks BL, Plourde V, Beauchamp MH, Tang K, Yeates KO, Keightley M, et al. Predicting Psychological Distress after Paediatric Concussion. *J Neurotrauma* 2018. doi:10.1089/neu.2018.5792
- 18 Brown EA, Kenardy J, Chandler B, Anderson V, McKinlay L, Le Brocque R. Parent-Reported Health-Related Quality of Life in Children With Traumatic Brain Injury: A Prospective Study. *J Pediatr Psychol* 2016;41:244-55. doi:10.1093/jpepsy/jsv090
- 19 Bunt SC, Didehbani N, Tarkenton T, Rossetti H, Hicks C, Vargas B, et al. Sex Differences and Reporting of SCAT-5 Concussion Symptoms in Adolescent Athletes. *Clin J Sport Med* 2020. doi:10.1097/jsm.0000000000000788
- 20 Butler K, Rourke BP, Fuerst DR, Fisk JL. A typology of psychosocial functioning in paediatric closed-head injury. *Child Neuropsychol* 1997;3:98-133. doi:10.1080/09297049708401371
- 21 Catale C, Marique P, Closset A, Meulemans T. Attentional and executive functioning following mild traumatic brain injury in children using the Test for Attentional Performance (TAP) battery. *J Clin Exp Neuropsychol* 2009;31:331-8. doi:10.1080/13803390802134616
- 22 Catroppa C, Godfrey C, Rosenfeld JV, Hearps SSJC, Anderson VA. Functional recovery ten years after paediatric traumatic brain injury: Outcomes and predictors. *J Neurotrauma* 2012;29:2539-47. doi:10.1089/neu.2012.2403
- 23 Crichton AJ, Babl F, Oakley E, Greenham M, Hearps S, Delzoppo C, et al. Prediction of Multidimensional Fatigue After Childhood Brain Injury. *J Head Trauma Rehabil* 2017;32:107-16. doi:10.1097/htr.0000000000000248
- 24 Crowe LM, Catroppa C, Babl FE, Anderson V. Intellectual, behavioural, and social outcomes of accidental traumatic brain injury in early childhood. *Paediatrics* 2012;129:e262-8. doi:10.1542/peds.2011-0438
- 25 Crowe L, Collie A, Hearps S, Dooley J, Clausen H, Maddocks D, et al. Cognitive and physical symptoms of concussive injury in children: a detailed longitudinal recovery study. *Br J Sports Med* 2016;50:311-6. doi:10.1136/bjsports-2015-094663
- 26 Ellis MJ, Ritchie LJ, Koltek M, Hosain S, Cordingley D, Chu S, et al. Psychiatric outcomes after paediatric sports-related concussion. *J Neurosurg Pediatr* 2015;16:709-18. doi:10.3171/2015.5.PEDS15220
- 27 Fischer JT, Hannay HJ, Alfano CA, Swank PR, Ewing-Cobbs L. Sleep disturbances and internalising behavior problems following paediatric traumatic injury. *Neuropsychology* 2018;32:161-75. doi:10.1037/neu0000420
- 28 Fletcher JM, Ewing-Cobbs L, Miner ME, Levin HS, Eisenberg HM. Behavioural changes after closed head injury in children. *J Consult Clin Psychol* 1990;58:93-8. doi:10.1037//0022-006x.58.1.93
- 29 Gagner C, Landry-Roy C, Bernier A, Gravel J, Beauchamp MH. Behavioural consequences of mild traumatic brain injury in preschoolers. *Psychol Med* 2018;48:1551-9. doi:10.1017/S0033291717003221
- 30 Gagner C, Dégeilh F, Bernier A, Beauchamp MH. Persistent Changes in Child Behavior After Early Mild Traumatic Brain Injury. *J Pediatr Psychol* 2019;45:50-60. doi:10.1093/jpepsy/jsz071

- 31 Gornall A, Takagi M, Clarke C, Babl F, Davis G, Dunne K, et al. Behavioural and emotional functioning following paediatric concussion. *J Neurotrauma* 2019;37:163-9. doi:10.1089/neu.2018.6235
- 32 Prigatano GP, Gray JA. Parental concerns and distress after paediatric traumatic brain injury: a qualitative study. *Brain Inj* 2007;21:721-9. doi:10.1080/02699050701481605
- 33 Guo X, Edmed SL, Anderson V, Kenardy J. Neurocognitive predictors of posttraumatic stress disorder symptoms in children 6 months after traumatic brain injury: A prospective study. *Neuropsychology* 2017;31:84-92. doi:10.1037/neu0000305
- 34 Ho RA, Hall GB, Noseworthy MD, DeMatteo C. An Emotional Go/No-Go fMRI study in adolescents with depressive symptoms following concussion. *Int J Psychophysiol* 2018;Part A. 132:62-73. doi:10.1016/j.ijpsycho.2017.09.021
- 35 Ho RA, Hall GB, Noseworthy MD, DeMatteo C. Post-concussive depression: evaluating depressive symptoms following concussion in adolescents and its effects on executive function. *Brain Inj* 2020;34:520-7. doi:10.1080/02699052.2020.1725841
- 36 Kaldoja ML, Kolk A. Social-emotional behaviour in infants and toddlers with mild traumatic brain injury. *Brain Inj* 2012;26:1005-13. doi:10.3109/02699052.2012.660516
- 37 Keenan HT, Clark AE, Holubkov R, Cox CS, Ewing-Cobbs L. Psychosocial and Executive Function Recovery Trajectories One Year after Paediatric Traumatic Brain Injury: The Influence of Age and Injury Severity. *J Neurotrauma* 2018;35:286-96. doi:10.1089/neu.2017.5265
- 38 Kenardy J, Le Brocque R, Hendrikz J, Iselin G, Anderson V, McKinlay L. Impact of posttraumatic stress disorder and injury severity on recovery in children with traumatic brain injury. *J Clin Child Adolesc* 2012;41:5-14. doi:10.1080/15374416.2012.632348
- 39 Königs M, Heij HA, van der Sluijs JA, Vermeulen RJ, Goslings JC, Luitse JSK, et al. Paediatric Traumatic Brain Injury and Attention Deficit. *Paediatrics* 2015;136:534-41. doi:10.1542/peds.2015-0437
- 40 Königs M, van Heurn LWE, Vermeulen RJ, Goslings JC, Luitse JSK, Poll-Thé BT, et al. Feedback learning and behavior problems after paediatric traumatic brain injury. *Psychol Med* 2016;46:1473-84. doi:10.1017/S0033291716000106
- 41 Kontos AP, Covassin T, Elbin RJ, Parker T. Depression and Neurocognitive Performance After Concussion Among Male and Female High School and Collegiate Athletes. *Arch Phys Med Rehab* 2012;93:1751-6. doi:10.1016/j.apmr.2012.03.032
- 42 Laliberte Durish C, Yeates KO, Brooks BL. Convergent and divergent validity of the Connor-Davidson Resilience Scale in children with concussion and orthopaedic injury. *Brain Inj* 2018;32:1525-33. doi:10.1080/02699052.2018.1502471
- 43 Lalonde G, Bernier A, Beaudoin C, Gravel J, Beauchamp MH. Factors contributing to parent-child interaction quality following mild traumatic brain injury in early childhood. *J Neuropsychol* 2020;14:98-120. doi:10.1111/jnp.12179
- 44 Luis CA, Mittenberg W. Mood and anxiety disorders following paediatric traumatic brain injury: a prospective study. *J Clin Exp Neuropsychol* 2002;24:270-9. doi:10.1076/jcen.24.3.270.982
- 45 Massagli TL, Fann JR, Burington BE, Jaffe KM, Katon WJ, Thompson RS. Psychiatric illness after mild traumatic brain injury in children. *Arch Phys Med Rehab* 2004;85:1428-34. doi:10.1016/j.apmr.2003.12.036
- 46 McKinlay A, Dalrymple-Alford JC, Horwood LJ, Fergusson DM, McKinlay A, Dalrymple-Alford JC, et al. Long term psychosocial outcomes after mild head injury in early childhood. *J Neurol Neurosurg Psychiatry* 2002;281:8. doi:10.1136/jnnp.73.3.281

- 47 McKinlay A, Grace R, Horwood J, Fergusson D, MacFarlane M. Adolescent psychiatric symptoms following preschool childhood mild traumatic brain injury: evidence from a birth cohort. *J Head Trauma Rehabil* 2009;24:221-7. doi:10.1097/HTR.0b013e3181a40590
- 48 McKinlay A, Grace RC, Horwood LJ, Fergusson DM, MacFarlane MR. Long-term behavioural outcomes of pre-school mild traumatic brain injury. *Child Care Health Dev* 2010;36:22-30. doi:10.1111/j.1365-2214.2009.00947.x.
- 49 McKinlay A, Grace RC, McLellan T, Roger D, Clarbours J, MacFarlane MR. Predicting adult offending behavior for individuals who experienced a traumatic brain injury during childhood. *J Head Trauma Rehabil* 2014;29:507-13. doi:10.1097/htr.0000000000000000
- 50 O'Connor SS, Zatzick DF, Wang J, Temkin N, Koepsell TD, Jaffe KM, et al. Association between posttraumatic stress, depression, and functional impairments in adolescents 24 months after traumatic brain injury. *J Trauma Stress* 2012;25:264-71. doi:10.1002/jts.21704
- 51 Plourde V, Yeates KO, Brooks BL. Predictors of Long-Term Psychosocial Functioning and Health-Related Quality of Life in Children and Adolescents With Prior Concussions. *J Int Neuropsychol Soc* 2018;24:540-8. doi:10.1017/s1355617718000061
- 52 Plourde V, Daya H, Low TA, Barlow KM, Brooks BL. Evaluating anxiety and depression symptoms in children and adolescents with prior mild traumatic brain injury: Agreement between methods and respondents. *Child Neuropsychol* 2019;25:44-59. doi:10.1080/09297049.2018.1432585
- 53 Renstrom B, Soderman K, Domellof E, Emanuelson I. Self-reported health and influence on life situation 5-8 years after paediatric traumatic brain injury. *Brain Inj* 2012;26:1405-14. doi:10.3109/02699052.2012.694559
- 54 Rockhill CM, Fann JR, Fan M-Y, Hollingworth W, Katon WJ. Healthcare costs associated with mild traumatic brain injury and psychological distress in children and adolescents. *Brain Inj* 2010;24:1051-60. doi:10.3109/02699052.2010.494586
- 55 Rosema S, Muscara F, Anderson V, Godfrey C, Hearps S, Catroppa C. The Trajectory of Long-Term Psychosocial Development 16 Years following Childhood Traumatic Brain Injury. *J Neurotrauma* 2015;32:976-83. doi:10.1089/neu.2014.3567
- 56 Ryan NP, Hughes N, Godfrey C, Rosema S, Catroppa C, Anderson VA. Prevalence and predictors of externalising behavior in young adult survivors of paediatric traumatic brain injury. *J Head Trauma Rehabil* 2015;30:75-85. doi:10.1097/HTR.000000000000123
- 57 Ryan NP, Catroppa C, Beare R, Silk TJ, Crossley L, Beauchamp MH, et al. Theory of mind mediates the prospective relationship between abnormal social brain network morphology and chronic behavior problems after paediatric traumatic brain injury. *Soc Cogn Affect Neurosci* 2016;11:683-92. doi:10.1093/scan/nsw007
- 58 Ryan NP, Noone K, Godfrey C, Botchway EN, Catroppa C, Anderson V. Young adults' perspectives on health-related quality of life after paediatric traumatic brain injury: A prospective cohort study. *Ann Phys Rehabil Med* 2019;62:342-50. doi:10.1016/j.rehab.2019.06.014
- 59 Sariaslan A, Sharp DJ, D'Onofrio BM, Larsson H, Fazel S. Long-Term Outcomes Associated with Traumatic Brain Injury in Childhood and Adolescence: A Nationwide Swedish Cohort Study of a Wide Range of Medical and Social Outcomes. *PLoS Med* 2016;13:e1002103. doi:10.1371/journal.pmed.1002103
- 60 Schachar R, Levin HS, Max JE, Purvis K, Chen S. Attention deficit hyperactivity disorder symptoms and response inhibition after closed head injury in children: do preinjury behavior and injury severity predict outcome? *Dev Neuropsychol* 2004;25:179-98. doi:10.1080/87565641.2004.9651927

- 61 Scott C, McKinlay A, McLellan T, Britt E, Grace R, MacFarlane M. A comparison of adult outcomes for males compared to females following paediatric traumatic brain injury. *Neuropsychology* 2015;29:501-8. doi:10.1037/neu0000074
- 62 Smyth K, Sandhu SS, Crawford S, Dewey D, Parboosingh J, Barlow KM. The role of serotonin receptor alleles and environmental stressors in the development of post-concussive symptoms after paediatric mild traumatic brain injury. *Dev Med Child Neurol* 2014;56:73-7. doi:10.1111/dmcn.12263
- 63 Stojanovski S, Felsky D, Viviano JD, Shahab S, Bangali R, Burton CL, et al. Polygenic Risk and Neural Substrates of Attention-Deficit/Hyperactivity Disorder Symptoms in Youths With a History of Mild Traumatic Brain Injury. *Biol Psychiatry* 2019;85:408-16. doi:10.1016/j.biopsych.2018.06.024
- 64 Taylor O, Barrett RD, McLellan T, McKinlay A. Traumatic brain injury and adverse life events: Group differences in young adults injured as children. *Brain Inj* 2015;29:709-14. doi:10.3109/02699052.2015.1004739
- 65 Theadom A, Cropley M, Parmar P, Barker-Collo S, Starkey N, Jones K, et al. Sleep difficulties one year following mild traumatic brain injury in a population-based study. *Sleep Med* 2015;16:926-32. doi:10.1016/j.sleep.2015.04.013
- 66 Truss K, Godfrey C, Takagi M, Babl FE, Bressan S, Hearps S, et al. Trajectories and Risk Factors for Post-Traumatic Stress Symptoms following Paediatric Concussion. *J Neurotrauma* 2017;34:2272-9. doi:10.1089/neu.2016.4842
- 67 Valovich McLeod TC, Wagner AJ, Bacon CEW. Lived Experiences of Adolescent Athletes Following Sport-Related Concussion. *Orthop J Sports Med* 2017;5. doi:10.1177/2325967117745033
- 68 Wilmoth K, Curcio N, Tarkenton T, Meredith-Duliba T, Tan A, Didehbani N, et al. Utility of Brief Psychological Measures for Prediction of Prolonged Symptom Clearance in Concussed Student Athletes. *Arch Clin Neuropsychol* 2019. doi:10.1093/arclin/acz061
- 69 Yang L-Y, Huang C-C, Chiu W-T, Huang L-T, Lo W-C, Wang J-Y. Association of traumatic brain injury in childhood and attention-deficit/hyperactivity disorder: a population-based study. *Paediatric Research* 2016;80:356-62. doi:10.1038/pr.2016.85
