# Supplementary figures and images for: Mental health after paediatric concussion: a systematic review and meta-analysis
Source: HighWire-hosted journal article supplement (doi:10.1136/bjsports-2020-103548), 2021-04-29

## Persisting Internalising Problems (3-12 months)

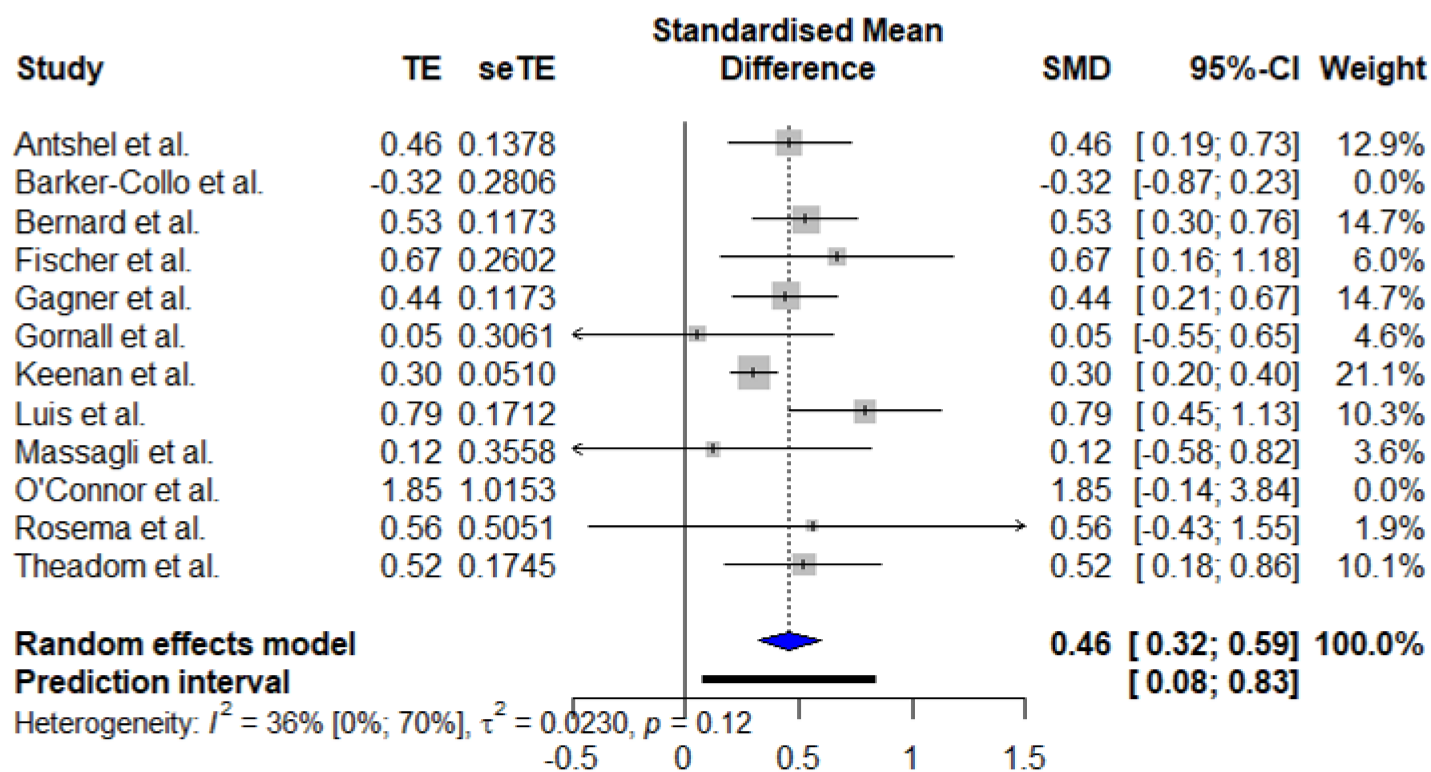

## Chronic Internalising Problems (>12 months)

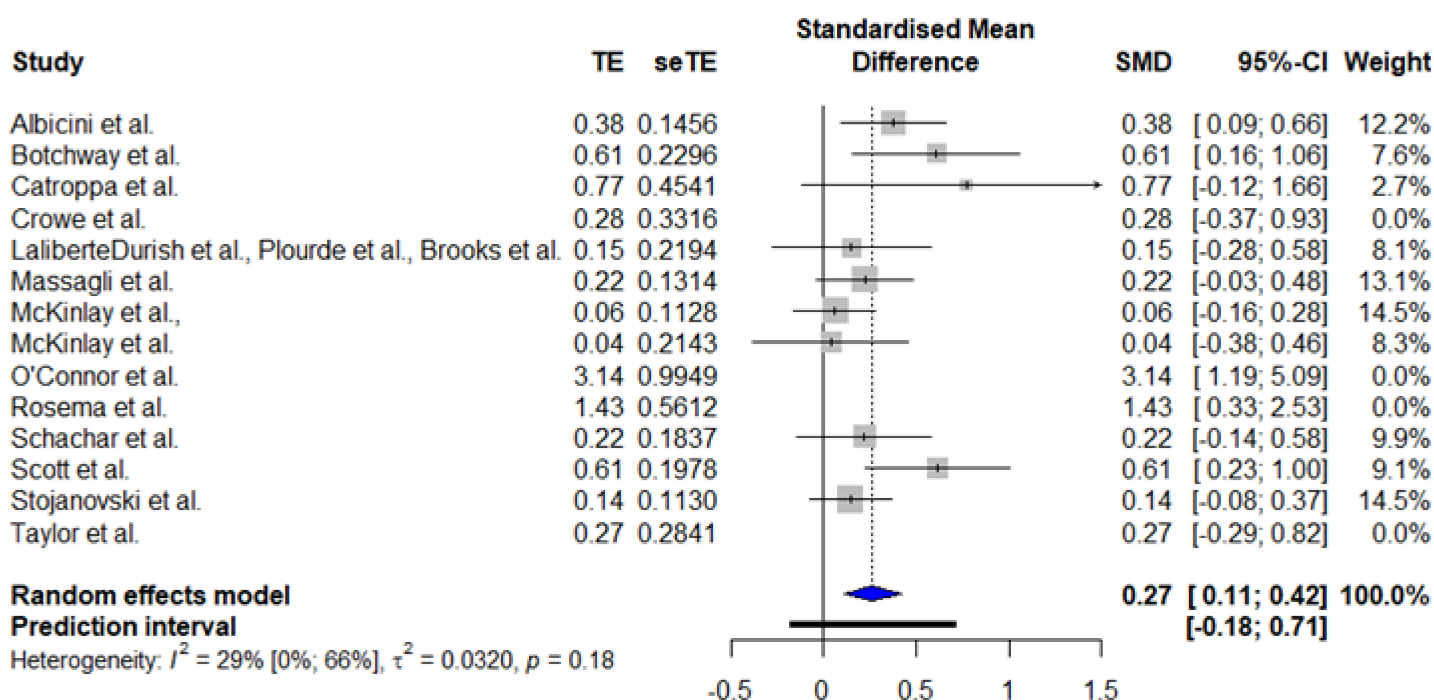

Supplement: bjsports-2020-103548supp002_data_supplement.pdf [file bjsports-2020-103548supp002_data_supplement.pdf]

## Persisting Externalising Problems (3-12 months)

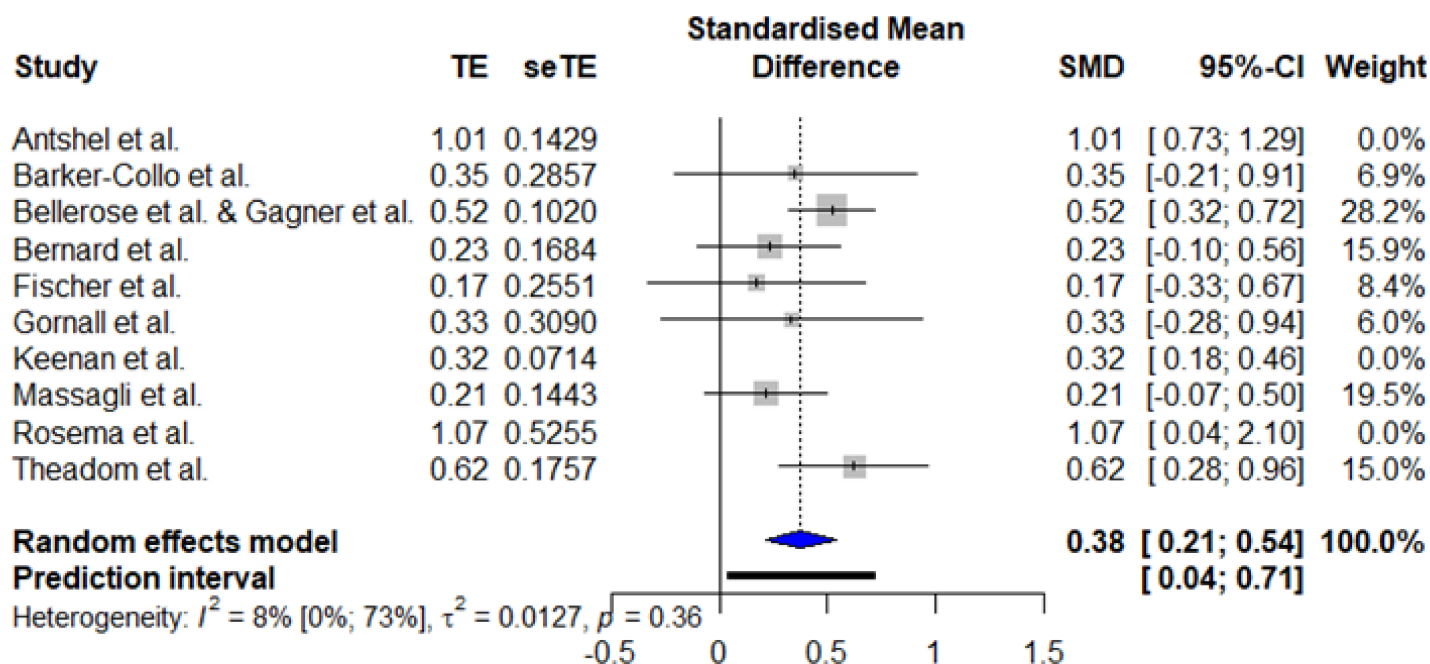

## Chronic Externalising Problems (>12 months)

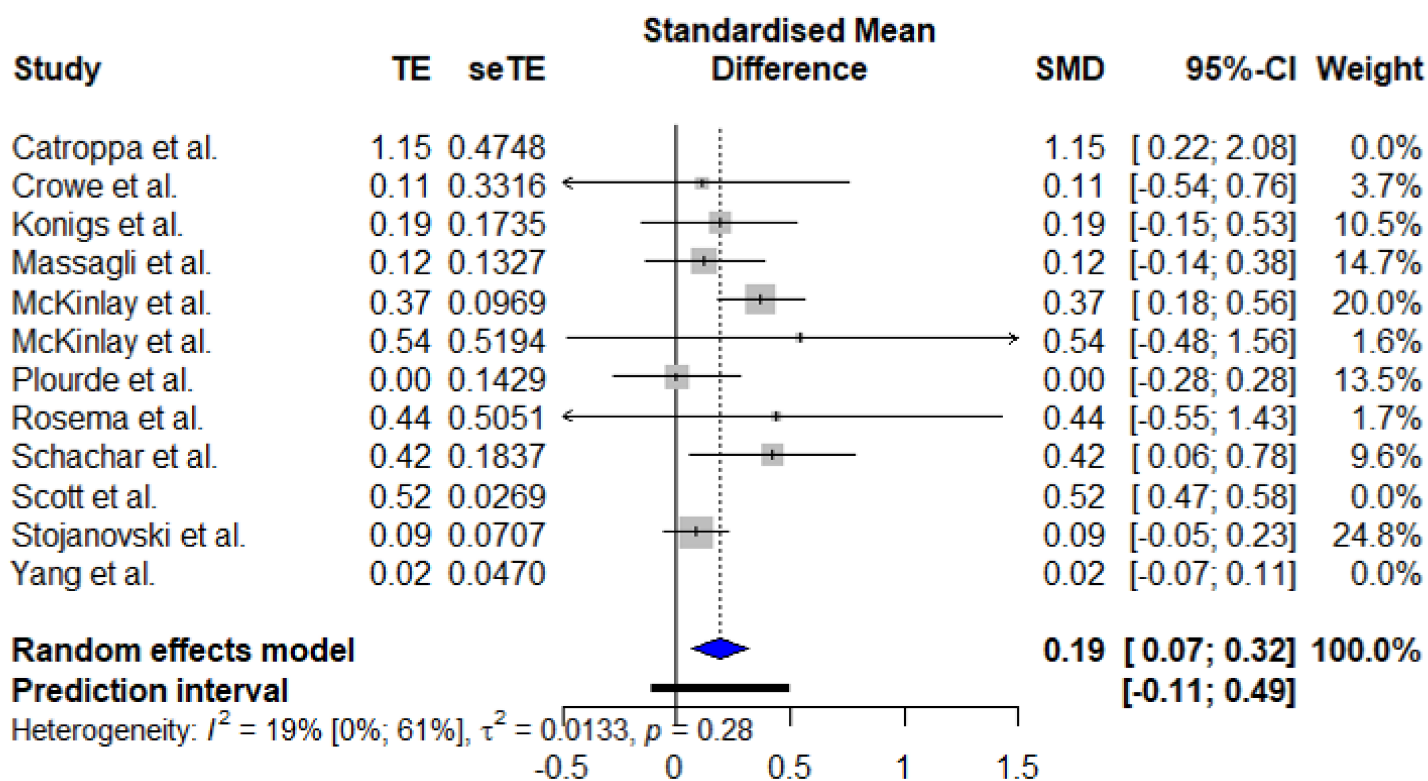

Supplement: bjsports-2020-103548supp003_data_supplement.pdf [file bjsports-2020-103548supp003_data_supplement.pdf]

## Persisting Internalising Problems (3-12 months)

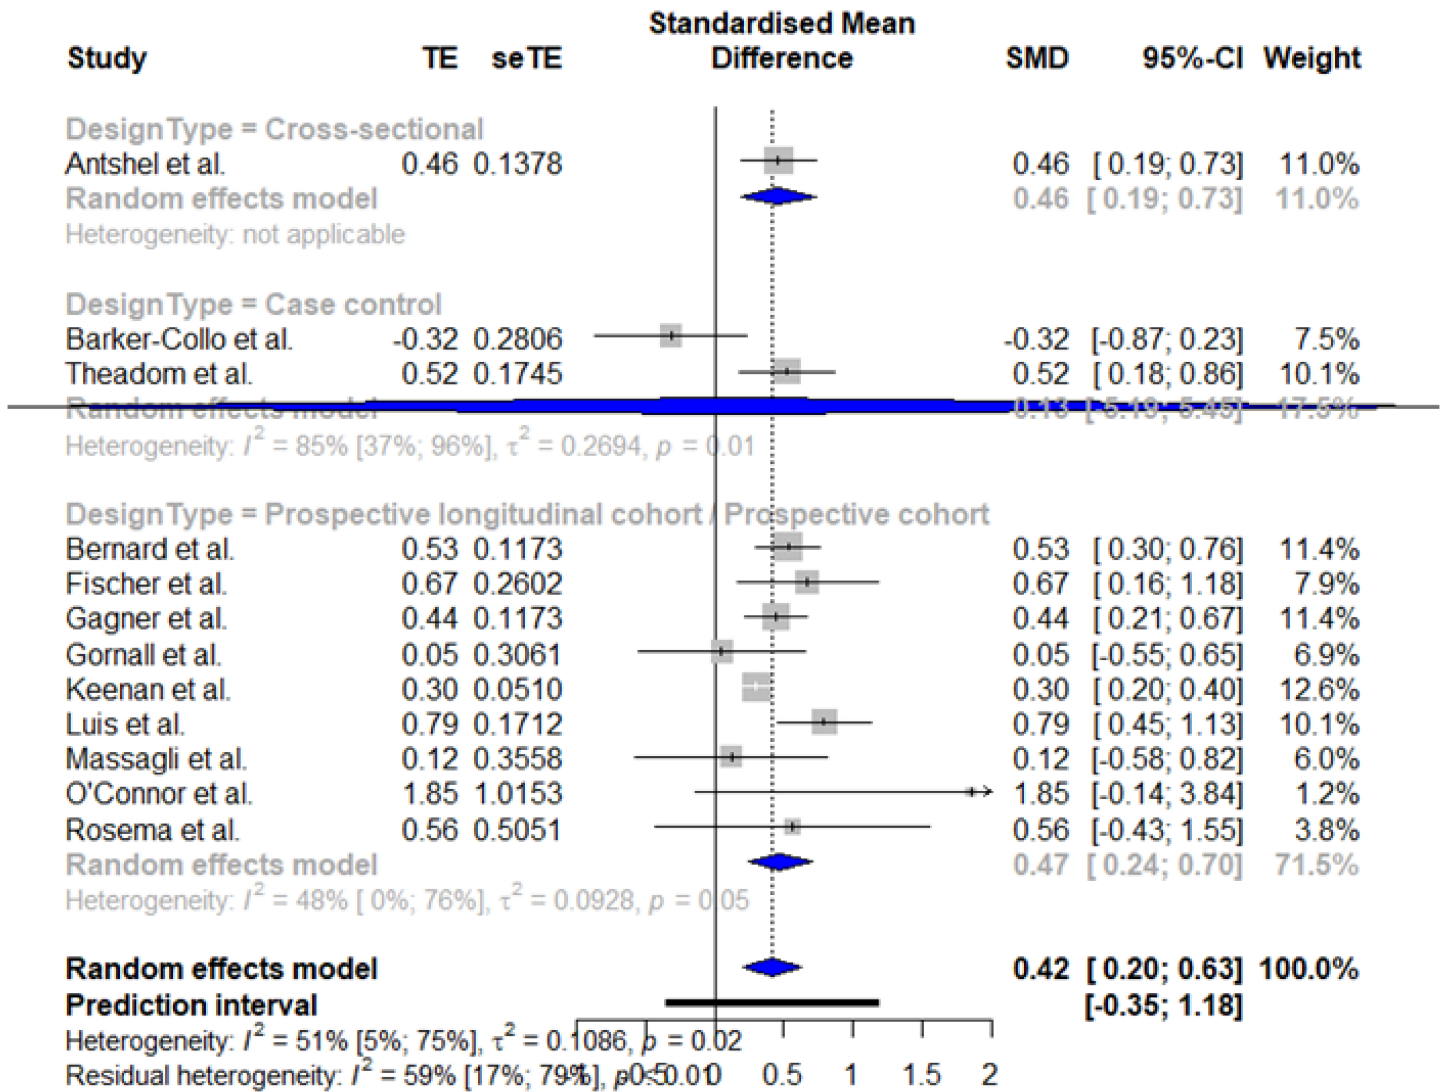

## Chronic Internalising Problems (>12 months)

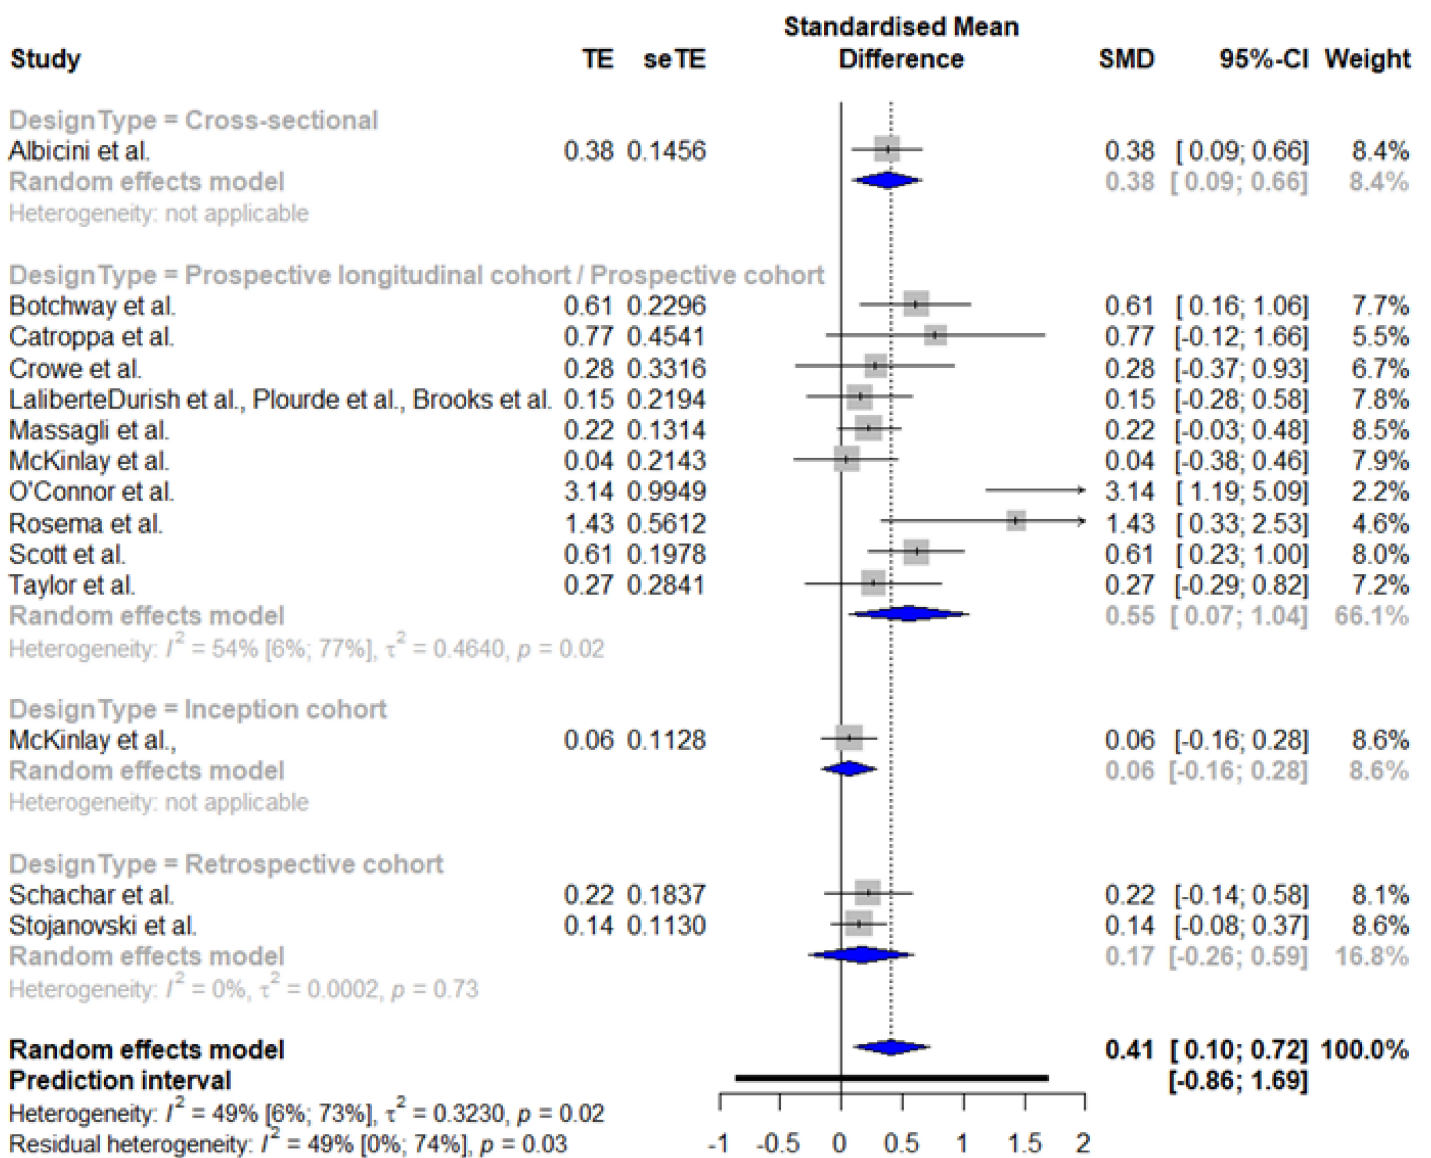

Supplement: bjsports-2020-103548supp005_data_supplement.pdf [file bjsports-2020-103548supp005_data_supplement.pdf]
